# Supplementary material for: Carbonate chemistry and carbon sequestration driven by inorganic carbon outwelling from mangroves and saltmarshes
Source: Springer Nature journal article supplement (doi:10.1038/s41467-023-44037-w), 2023-12-11
Supplement: MOESM1 [file 41467_2023_44037_MOESM1_ESM.pdf]

## Supplementary Information

### Carbonate chemistry and carbon sequestration driven by inorganic carbon outwelling from mangroves and saltmarshes

Gloria M. S. Reithmaier, Alex Cabral, Anirban Akhand, Matthew J. Bogard, Alberto V. Borges, Steven Bouillon, David J. Burdige, Mitchel Call, Nengwang Chen, Xiaogang Chen, Luiz C. Cotovicz Jr, Meagan J. Eagle, Erik Kristensen, Kevin D. Kroeger, Zeyang Lu, Damien T. Maher, J. Lucas Pérez-Lloréns, Raghav Ray, Pierre Taillardat, Joseph J. Tamborski, Rob C. Upstill-Goddard, Faming Wang, Zhaohui Aleck Wang, Kai Xiao, Yvonne Y. Y. Yau, and Isaac R. Santos

#### Table of Contents

|                                                                                                                                                                                                                                                                                                                                                                                                                                                                                                                                                                                                                                            |   |
|--------------------------------------------------------------------------------------------------------------------------------------------------------------------------------------------------------------------------------------------------------------------------------------------------------------------------------------------------------------------------------------------------------------------------------------------------------------------------------------------------------------------------------------------------------------------------------------------------------------------------------------------|---|
| Supplementary Figures.....                                                                                                                                                                                                                                                                                                                                                                                                                                                                                                                                                                                                                 | 3 |
| Supplementary Fig. 1   Inorganic carbon concentrations in intertidal wetlands. a, Alkalinity (TA) and (b) dissolved inorganic carbon (DIC) concentrations in porewater (PW) were two- to three-times higher than concentrations in surface water (SW). Numbers show medians. Outliers were excluded. Boxplots indicate median (middle line), 25th, 75th percentile (box) and 5th and 95th percentile (whiskers).....                                                                                                                                                                                                                       | 3 |
| Supplementary Fig. 2   Potential drivers of TA:DIC ratios in intertidal wetlands. Correlations between TA:DIC ratios and (a) salinity, (b) dissolved oxygen (DO), (c) temperature, (d) partial pressure of carbon dioxide ( $p\text{CO}_2$ ), (e) dissolved organic carbon (DOC), and (f) particulate organic carbon (POC) in porewater (PW) and surface water (SW). Gray areas indicate the 95% confidence intervals of the regressions. ....                                                                                                                                                                                             | 3 |
| Supplementary Fig. 3   Potential drivers of TA:DIC ratios in intertidal wetlands. Correlations between TA:DIC ratios and (a) porewater tracer radon-222 ( $\text{Rn}$ ), (b) phosphate ( $\text{PO}_4$ ), (c) total phosphorus (TP), (d) ammonium ( $\text{NH}_4^+$ ), (e) nitrogen oxides ( $\text{NO}_x = \text{nitrate and nitrite}$ ), and (f) total nitrogen (TN) in porewater (PW) and surface water (SW). Gray areas indicate the 95% confidence intervals of the regressions. ....                                                                                                                                                 | 4 |
| Supplementary Fig. 4   Pristine mangrove estuaries are sources for alkalinity (TA) and dissolved inorganic carbon (DIC). a, TA and (b) DIC measured during spatial surveys and conservative mixing lines. Conservative mixing lines were estimated from TA and DIC concentrations at the lowest and highest salinities at each site. ....                                                                                                                                                                                                                                                                                                  | 4 |
| Supplementary Fig. 5   Four out of six pristine mangrove-dominated estuaries had larger estuarine dissolved inorganic carbon (DIC) than alkalinity (TA) inputs. The standard estuarine mixing model was used to calculate estuarine TA and DIC sources/sinks in surface water along six pristine mangrove estuaries with a clear salinity gradient. Deviations between TA and DIC concentrations, measured during spatial surveys, and conservative mixing lines were calculated as a percentage and averaged for each estuary. Positive excess values indicate a source within the estuary, whereas negative values indicate a sink. .... | 5 |
| Supplementary Fig. 6   Seasonal changes of TA:DIC ratios in coastal wetlands and anthropogenic impacts. TA:DIC ratios measured during different seasons in porewater (PW) and surface water (SW) at (a) mangroves and (b) saltmarshes. c, TA:DIC ratios in pristine versus anthropogenically impacted sites. Boxplots indicate median (middle line), 25th, 75th percentile (box) and 5th and 95th percentile (whiskers).....                                                                                                                                                                                                               | 5 |
| Supplementary Fig. 7   Most intertidal wetlands had higher dissolved inorganic carbon (DIC) than alkalinity (TA) outwelling rates. a, Regression between TA and DIC outwelling and (b) TA:DIC outwelling ratios per site.....                                                                                                                                                                                                                                                                                                                                                                                                              | 6 |
| Supplementary Fig. 8   Most studies measuring alkalinity (TA) outwelling rates from intertidal wetlands were conducted in the USA and Australia. Rates are scaled to the intertidal wetland area. The location of some sites was adjusted slightly to allow visualization. The precise coordinates are available on Table S3.....                                                                                                                                                                                                                                                                                                          | 6 |
| Supplementary Fig. 9   Potential drivers of dissolved inorganic carbon (DIC) outwelling in intertidal wetlands. Regressions between TA:DIC outwelling ratios and (a) average annual temperature, (b) average annual precipitation, (c) intertidal amplitude, (d) sediment accumulation rates (SAR), (e) carbon accumulation rates (CAR), and (f) unsigned latitudes. Unsigned latitude refers to latitudes in both hemispheres disregarding the                                                                                                                                                                                            |   |

minus sign in the southern hemisphere to examine the impact of climate rather than hemisphere. Gray areas indicate the 95% confidence intervals of the regressions. .... 7

Supplementary Fig. 10 | Potential drivers of alkalinity (TA) outwelling in intertidal wetlands. Regressions between TA:DIC outwelling ratios and (a) average annual temperature, (b) average annual precipitation, (c) intertidal amplitude, (d) sediment accumulation rates (SAR), (e) carbon accumulation rates (CAR), and (f) unsigned latitudes. Unsigned latitude refers to latitudes in both hemispheres disregarding the minus sign in the southern hemisphere to examine the impact of climate rather than hemisphere. Gray areas indicate the 95% confidence intervals of the regressions. .... 8

**Supplementary Tables** ..... 9

Supplementary Table 1 | Information about sites with alkalinity (TA) and dissolved inorganic carbon (DIC) observations in porewater (PW) or in surface water measured during time series (TS) or spatial surveys (SV).9

Supplementary Table 2 | Calculations of inorganic carbon dynamics per site in porewater (PW) and surface water (SW)..... 13

Supplementary Table 3 | Alkalinity (TA) and dissolved inorganic carbon (DIC) outwelling rates from mangroves and saltmarshes. .... 15

Supplementary Table 4 | Average alkalinity (TA) and dissolved inorganic carbon (DIC) outwelling rates per site and potential drivers, including sediment accumulation rate (SAR), and carbon accumulation rate (CAR), retrieved from global datasets<sup>55</sup>. .... 20

Supplementary Table 5 | Net primary production (NPP) and major carbon fates of mangrove and saltmarsh production presented in MgC/ha/y as median ± SE (average)..... 22

Supplementary Table 6 | Global alkalinity balance of the ocean. .... 22

**Supplementary Methods**..... 23

Supplementary Fig. 11. pH increases with increasing TA:DIC ratios. .... 23

Supplementary Fig. 12. pH acts as a function of increasing alkalinity (TA) at fixed TA:DIC ratios. .... 24

Supplementary Fig. 13. Regressions analysis between H<sup>+</sup> and TA:DIC ratios..... 24

**Supplementary References** ..... 25

## Supplementary Figures

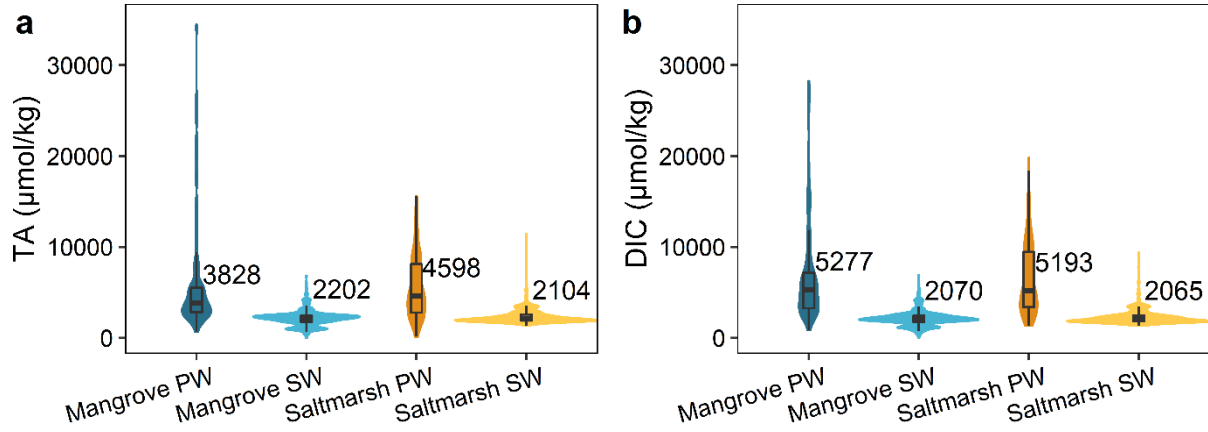

**Supplementary Fig. 1 | Inorganic carbon concentrations in intertidal wetlands.** **a**, Alkalinity (TA) and **(b)** dissolved inorganic carbon (DIC) concentrations in porewater (PW) were two- to three-times higher than concentrations in surface water (SW). Numbers show medians. Outliers were excluded. Boxplots indicate median (middle line), 25th, 75th percentile (box) and 5th and 95th percentile (whiskers).

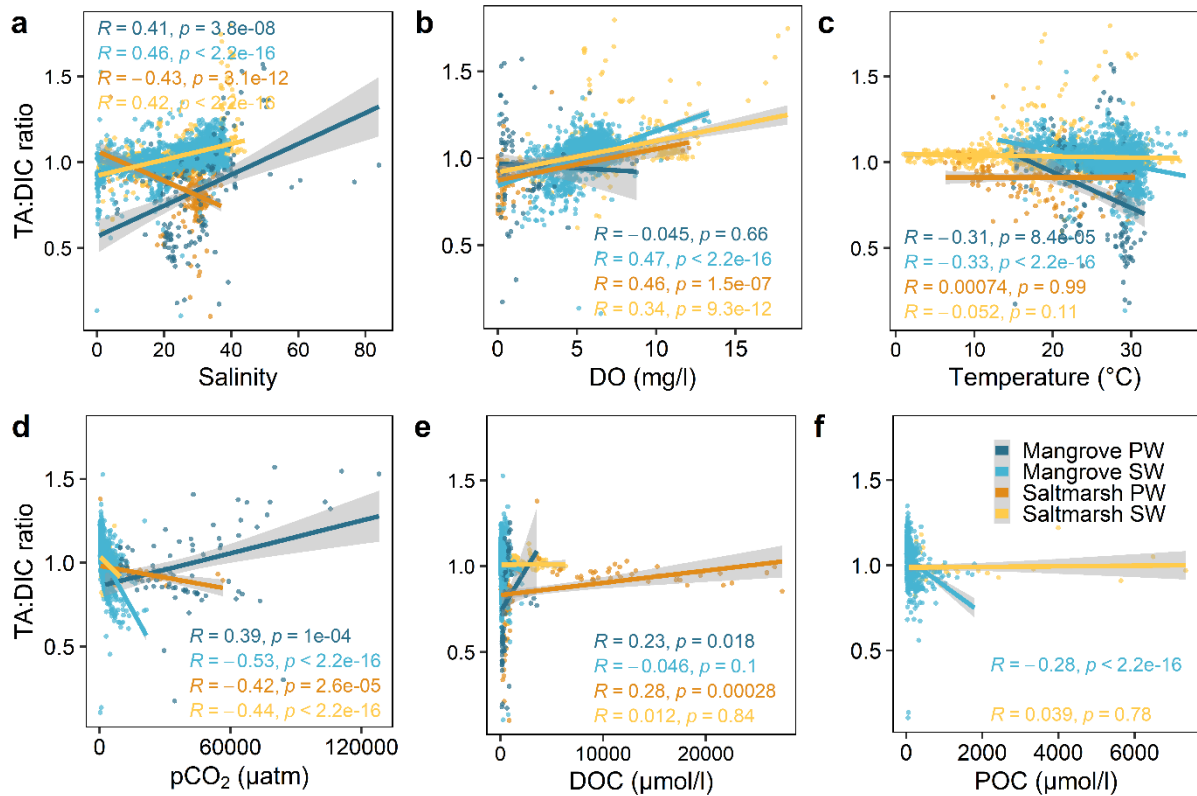

**Supplementary Fig. 2 | Potential drivers of TA:DIC ratios in intertidal wetlands.** Correlations between TA:DIC ratios and **(a)** salinity, **(b)** dissolved oxygen (DO), **(c)** temperature, **(d)** partial pressure of carbon dioxide ( $p\text{CO}_2$ ), **(e)** dissolved organic carbon (DOC), and **(f)** particulate organic carbon (POC) in porewater (PW) and surface water (SW). Gray areas indicate the 95% confidence intervals of the regressions.

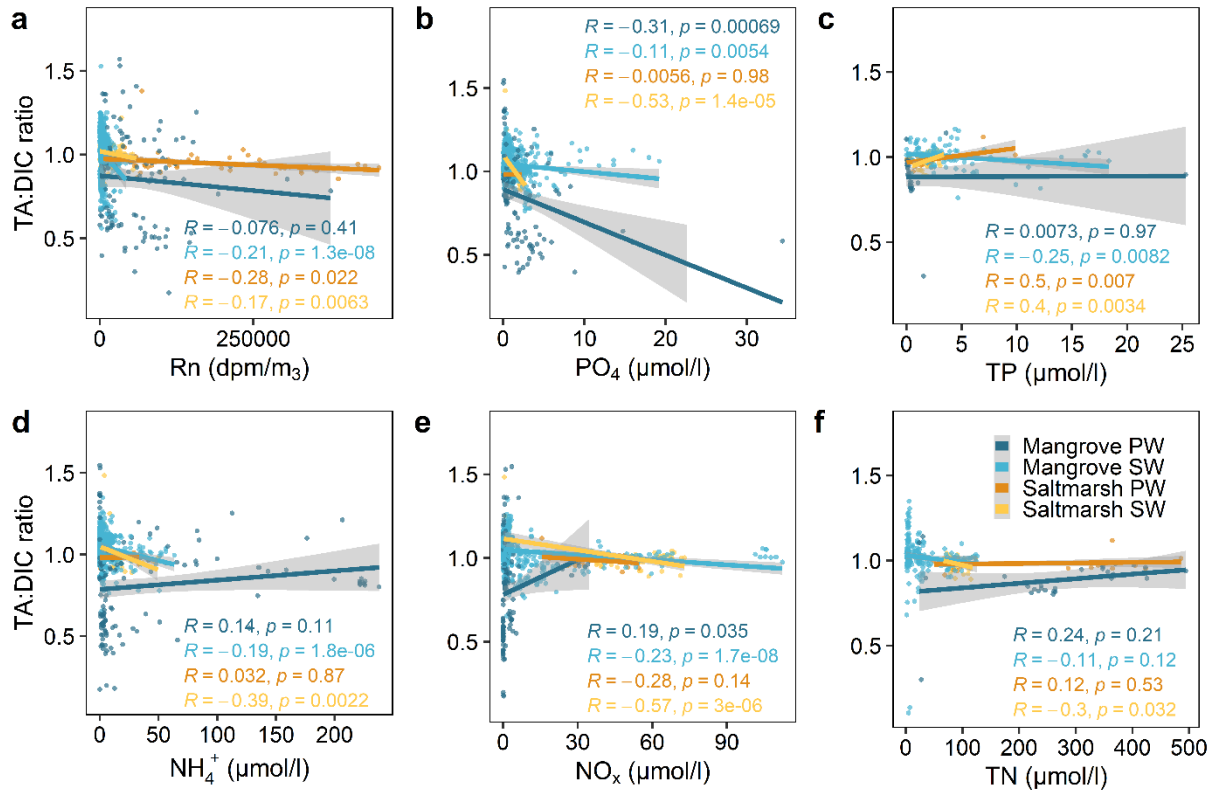

**Supplementary Fig. 3 | Potential drivers of TA:DIC ratios in intertidal wetlands.** Correlations between TA:DIC ratios and (a) porewater tracer radon-222 (Rn), (b) phosphate (PO<sub>4</sub>), (c) total phosphorus (TP), (d) ammonium (NH<sub>4</sub><sup>+</sup>), (e) nitrogen oxides (NO<sub>x</sub> = nitrate and nitrite), and (f) total nitrogen (TN) in porewater (PW) and surface water (SW). Gray areas indicate the 95% confidence intervals of the regressions.

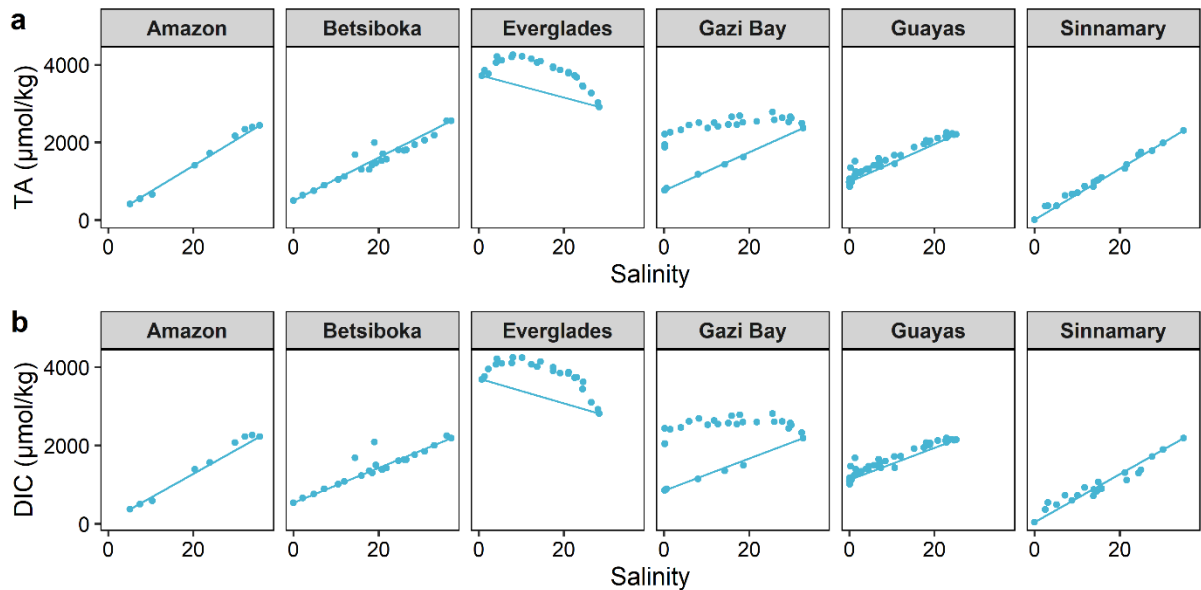

**Supplementary Fig. 4 | Pristine mangrove estuaries are sources for alkalinity (TA) and dissolved inorganic carbon (DIC).** a, TA and (b) DIC measured during spatial surveys and conservative mixing lines. Conservative mixing lines were estimated from TA and DIC concentrations at the lowest and highest salinities at each site.

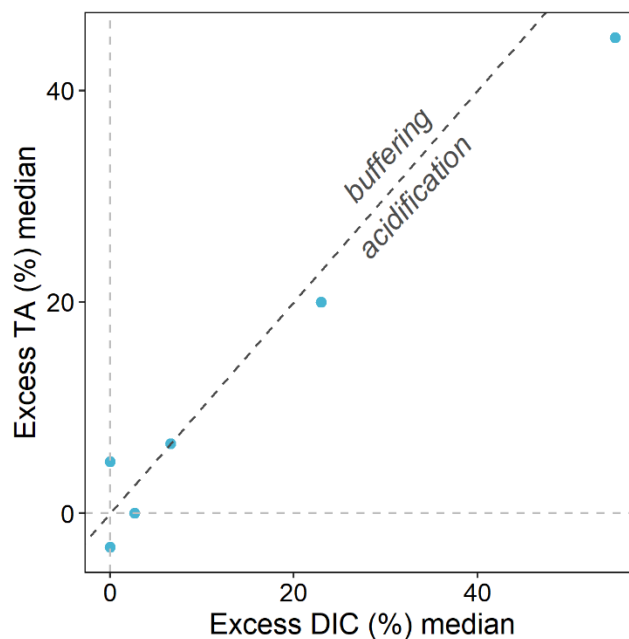

**Supplementary Fig. 5 | Four out of six pristine mangrove-dominated estuaries had larger estuarine dissolved inorganic carbon (DIC) than alkalinity (TA) inputs.** The standard estuarine mixing model was used to calculate estuarine TA and DIC sources/sinks in surface water along six pristine mangrove estuaries with a clear salinity gradient. Deviations between TA and DIC concentrations, measured during spatial surveys, and conservative mixing lines were calculated as a percentage and averaged for each estuary. Positive excess values indicate a source within the estuary, whereas negative values indicate a sink.

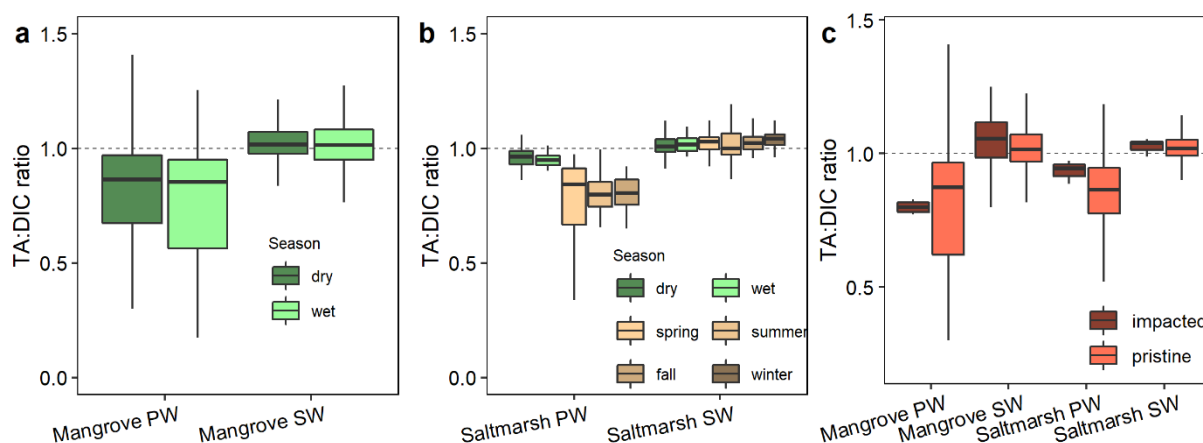

**Supplementary Fig. 6 | Seasonal changes of TA:DIC ratios in coastal wetlands and anthropogenic impacts.** TA:DIC ratios measured during different seasons in porewater (PW) and surface water (SW) at (a) mangroves and (b) saltmarshes. c, TA:DIC ratios in pristine versus anthropogenically impacted sites. Boxplots indicate median (middle line), 25th, 75th percentile (box) and 5th and 95th percentile (whiskers).

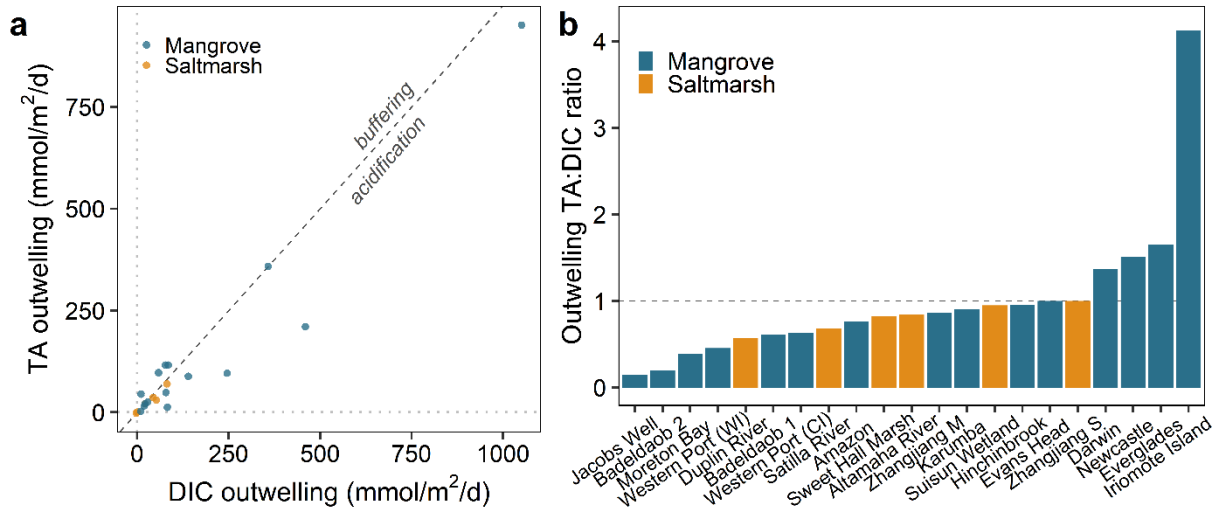

**Supplementary Fig. 7 | Most intertidal wetlands had higher dissolved inorganic carbon (DIC) than alkalinity (TA) outwelling rates. a, Regression between TA and DIC outwelling and (b) TA:DIC outwelling ratios per site.**

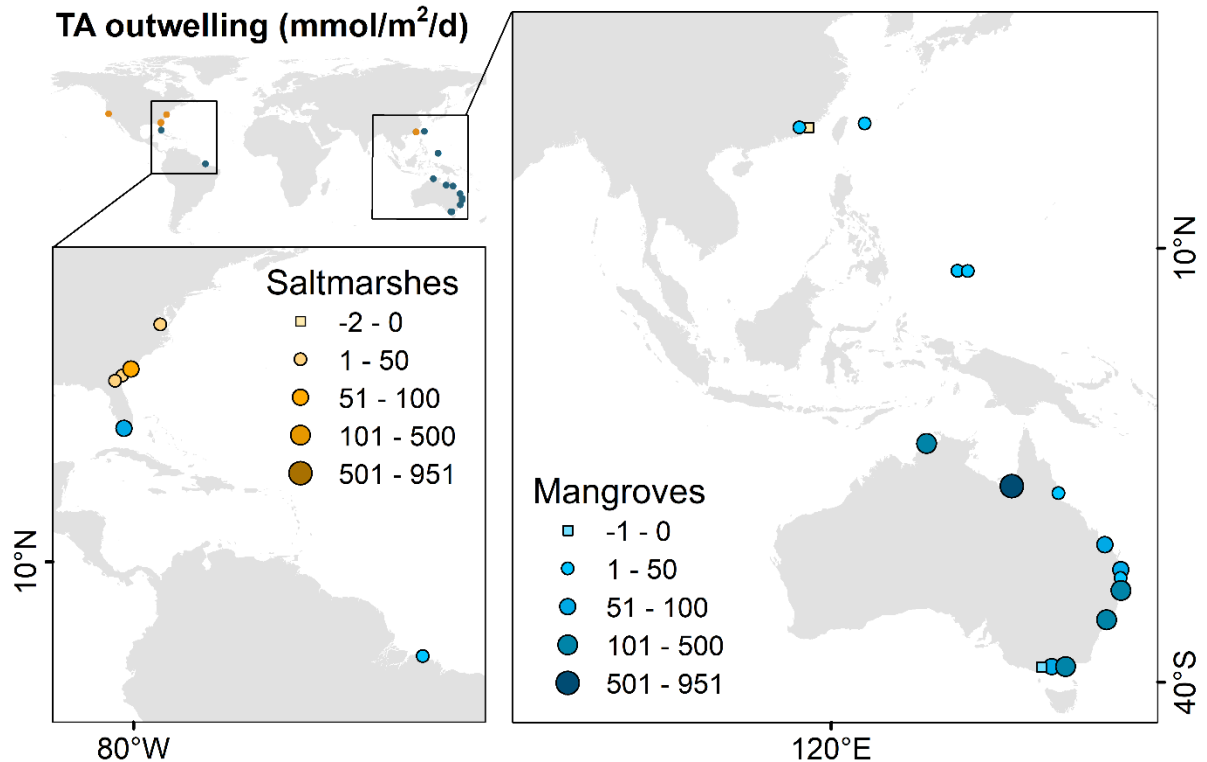

**Supplementary Fig. 8 | Most studies measuring alkalinity (TA) outwelling rates from intertidal wetlands were conducted in the USA and Australia. Rates are scaled to the intertidal wetland area. The location of some sites was adjusted slightly to allow visualization. The precise coordinates are available on Table S3.**

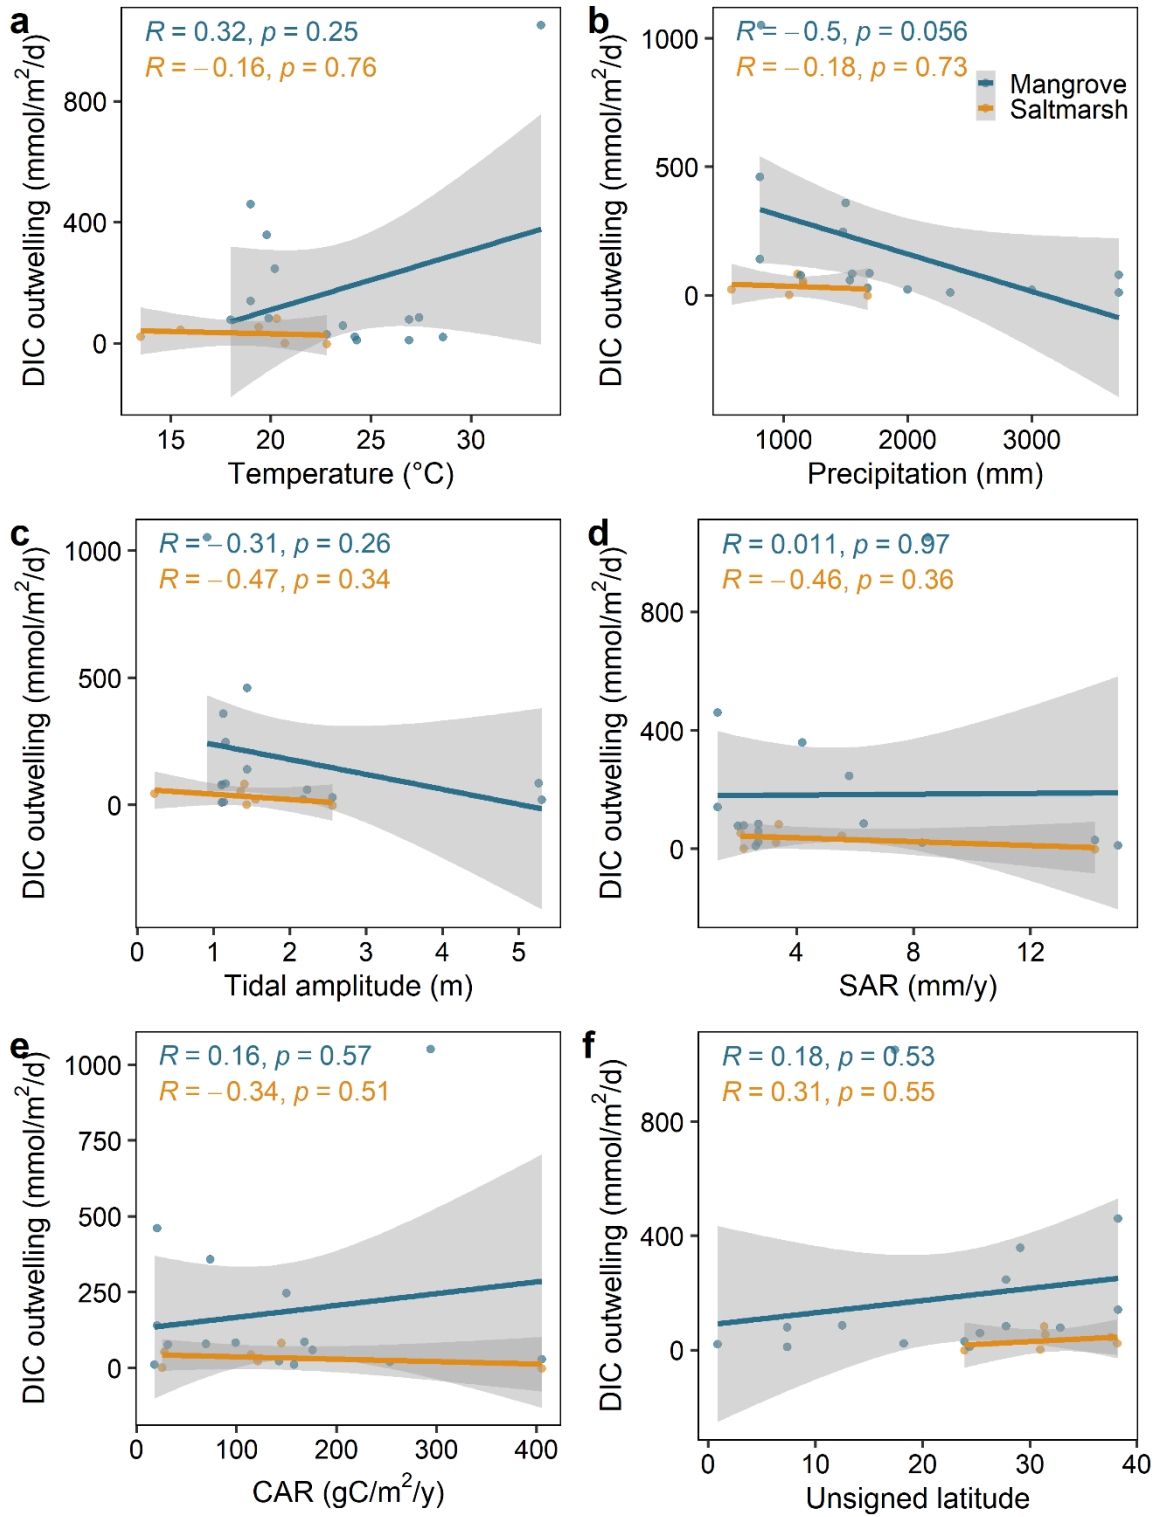

**Supplementary Fig. 9 | Potential drivers of dissolved inorganic carbon (DIC) outwelling in intertidal wetlands.** Regressions between TA:DIC outwelling ratios and (a) average annual temperature, (b) average annual precipitation, (c) intertidal amplitude, (d) sediment accumulation rates (SAR), (e) carbon accumulation rates (CAR), and (f) unsigned latitudes. Unsigned latitude refers to latitudes in both hemispheres disregarding the minus sign in the southern hemisphere to examine the impact of climate rather than hemisphere. Gray areas indicate the 95% confidence intervals of the regressions.

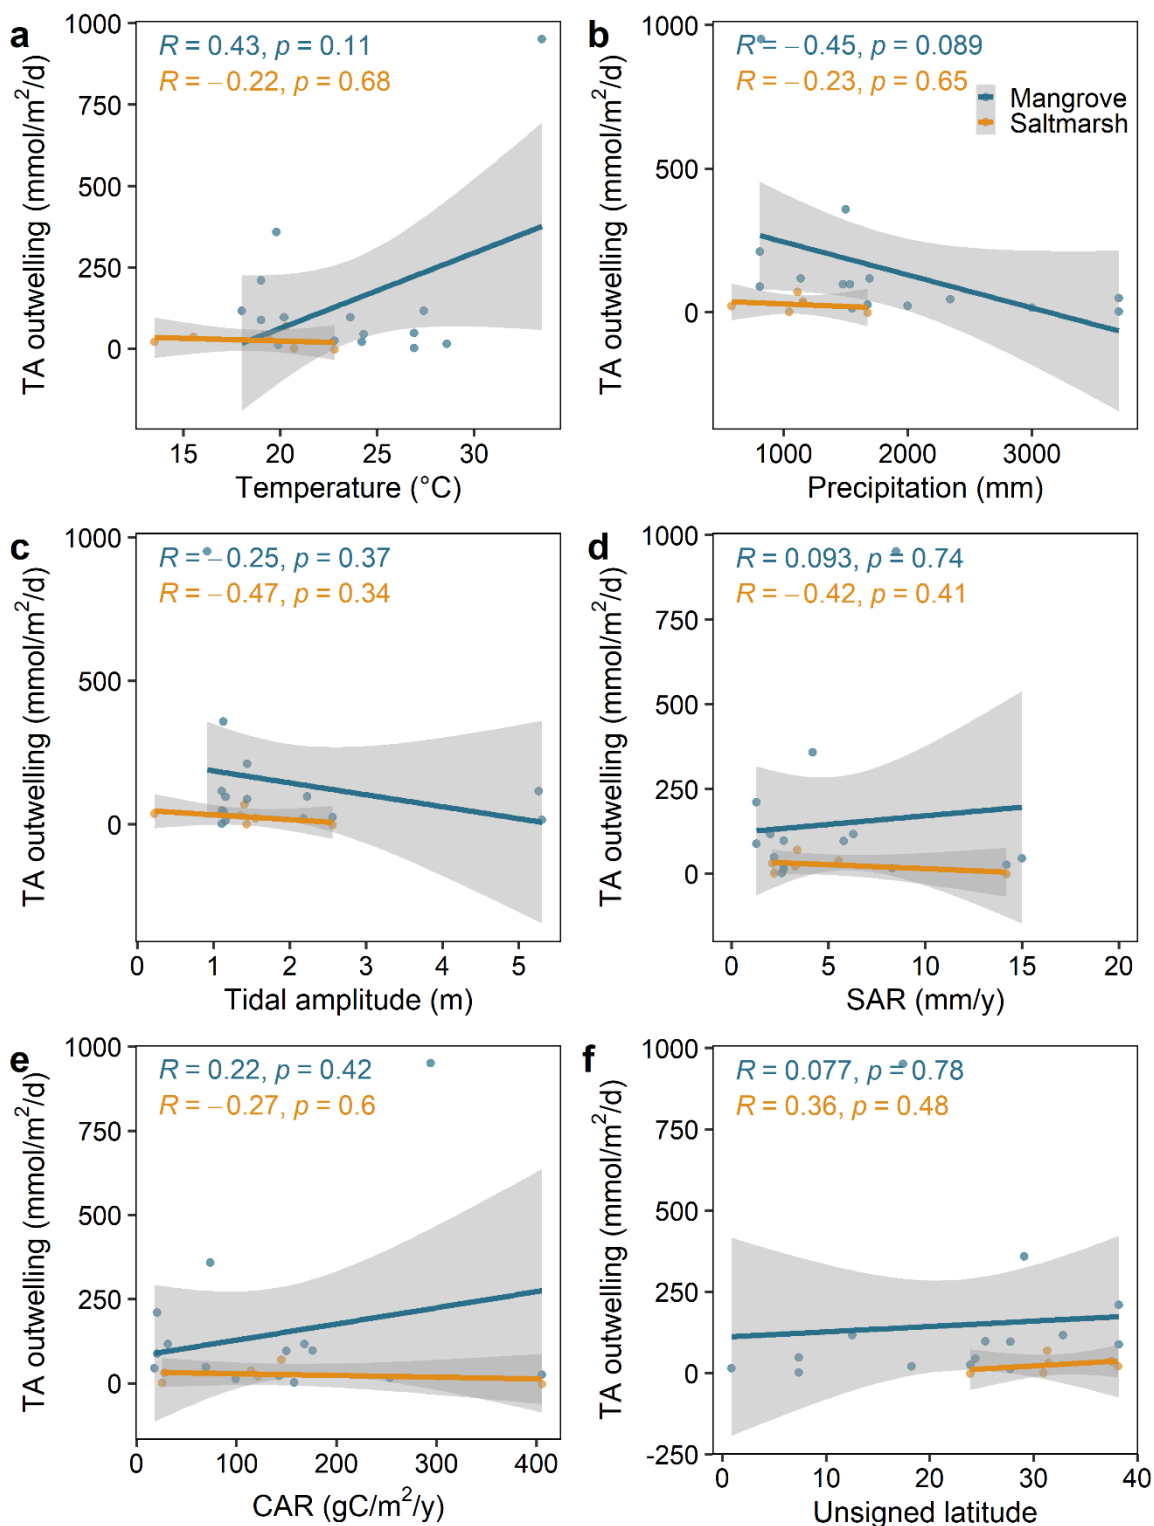

**Supplementary Fig. 10 | Potential drivers of alkalinity (TA) outwelling in intertidal wetlands.** Regressions between TA:DIC outwelling ratios and (a) average annual temperature, (b) average annual precipitation, (c) intertidal amplitude, (d) sediment accumulation rates (SAR), (e) carbon accumulation rates (CAR), and (f) unsigned latitudes. Unsigned latitude refers to latitudes in both hemispheres disregarding the minus sign in the southern hemisphere to examine the impact of climate rather than hemisphere. Gray areas indicate the 95% confidence intervals of the regressions.



## Supplementary Tables

**Supplementary Table 1** | Information about sites with alkalinity (TA) and dissolved inorganic carbon (DIC) observations in porewater (PW) or in surface water measured during time series (TS) or spatial surveys (SV).

| Ecosystem | Country | ID  | Site           | Condition      | Latitude | Longitude | Type | Sample number | Study period (d) | Season | Reference                                                                                                            |
|-----------|---------|-----|----------------|----------------|----------|-----------|------|---------------|------------------|--------|----------------------------------------------------------------------------------------------------------------------|
| Saltmarsh | MA, USA | S01 | Sage Lot Pond  | Pristine creek | 41.555   | -70.5071  | TS   | 291           | 35               | annual | Tamborski, et al. <sup>1</sup><br>Wang, et al. <sup>2</sup><br>Song, et al. <sup>3</sup><br>Chu, et al. <sup>4</sup> |
| Saltmarsh | MA, USA | S01 | Sage Lot Pond  | Pristine creek | 41.555   | -70.507   | PW   | 145           | 11               | annual | Brooks, et al. <sup>5</sup><br>Tamborski, et al. <sup>1</sup>                                                        |
| Saltmarsh | CA, USA | S02 | Suisun Marsh   | Pristine creek | 38.195   | -122.033  | TS   | 31            | 2                | annual | Bogard, et al. <sup>6</sup>                                                                                          |
| Saltmarsh | SC, USA | S03 | Oyster Landing | Pristine creek | 33.333   | -79.200   | TS   | 13            | 1                | summer | Correa, et al. <sup>7</sup>                                                                                          |
| Saltmarsh | SC, USA | S03 | Oyster Landing | Pristine creek | 33.333   | -79.200   | PW   | 8             | 3                | summer | Correa, et al. <sup>7</sup>                                                                                          |
| Saltmarsh | GA, USA | S04 | Duplin River   | Pristine creek | 31.421   | -81.296   | TS   | 223           | 19               | annual | Wang and Cai <sup>8</sup>                                                                                            |
| Saltmarsh | Spain   | S05 | Los Toruños    | Pristine creek | 36.561   | -6.207    | TS   | 89            | 10               | annual | Pérez-Lloréns, et al. <sup>9</sup><br>Chen, et al. <sup>11</sup><br>Yau, et al. <sup>10</sup>                        |
| Saltmarsh | China   | S06 | Chuangdong     | Pristine creek | 33.047   | 120.867   | TS   | 153           | 2                | dry    | Yau, et al. <sup>10</sup><br>Chen, et al. <sup>11</sup>                                                              |
| Saltmarsh | China   | S06 | Chuangdong     | Pristine creek | 33.047   | 120.867   | PW   | 54            | 11               | dry    | Yau, et al. <sup>10</sup><br>Chen, et al. (unpublished)                                                              |
| Saltmarsh | China   | S06 | Chuangdong     | Pristine creek | 33.037   | 120.841   | SV   | 53            | 2                | dry    | Yau, et al. <sup>10</sup><br>Chen, et al. (unpublished)                                                              |
| Saltmarsh | China   | S07 | Hangzhou Bay   | Impacted creek | 30.355   | 121.128   | SV   | 36            | 5                | spring | Zhu, et al. <sup>12</sup>                                                                                            |
| Saltmarsh | China   | S07 | Hangzhou Bay   | Impacted creek | 30.355   | 121.128   | PW   | 8             | 4                | spring | Zhu, et al. <sup>12</sup>                                                                                            |

Supplementary Information (NCOMMS-23-40896) by Reithmaier et al.

|           |             |     |               |                             |        |         |    |     |    |        |                                                                                                                                                           |
|-----------|-------------|-----|---------------|-----------------------------|--------|---------|----|-----|----|--------|-----------------------------------------------------------------------------------------------------------------------------------------------------------|
| Saltmarsh | China       | S08 | Zhangjiang E. | Impacted creek              | 23.921 | 117.426 | TS | 51  | 2  | dry    | Lu, et al. (unpublished)                                                                                                                                  |
| Saltmarsh | China       | S08 | Zhangjiang E. | Impacted creek              | 23.921 | 117.426 | PW | 28  | 4  | dry    | Lu, et al. (unpublished)                                                                                                                                  |
| Mangrove  | FL, USA     | M01 | Everglades    | Pristine estuary            | 25.362 | -81.085 | TS | 57  | 2  | dry    | Reithmaier, et al. <sup>13</sup>                                                                                                                          |
| Mangrove  | FL, USA     | M01 | Everglades    | Pristine estuary            | 25.362 | -81.085 | SV | 24  | 1  | dry    | Reithmaier, et al. <sup>13</sup>                                                                                                                          |
| Mangrove  | Japan       | M02 | Iriomote      | Pristine estuary            | 24.384 | 123.887 | TS | 6   | 3  | wet    | Akhand, et al. <sup>14</sup>                                                                                                                              |
| Mangrove  | China       | M03 | Zhangjiang E. | Impacted creek              | 23.925 | 117.422 | TS | 52  | 2  | dry    | Lu, et al. (unpublished)                                                                                                                                  |
| Mangrove  | China       | M03 | Zhangjiang E. | Impacted creek              | 23.925 | 117.422 | PW | 25  | 4  | dry    | Lu, et al. (unpublished)                                                                                                                                  |
| Mangrove  | India       | M04 | Sundarbans    | Pristine estuary and creeks | 22.002 | 88.722  | TS | 113 |    | annual | Ray, et al. <sup>15</sup><br>Akhand, et al. <sup>16</sup><br>Akhand, et al. <sup>17</sup><br>Akhand, et al. <sup>18</sup><br>Akhand, et al. <sup>19</sup> |
| Mangrove  | India       | M05 | Bhitarkanika  | Pristine estuary            | 20.777 | 86.847  | TS | 43  | 16 | annual | Akhand, et al. <sup>19</sup>                                                                                                                              |
| Mangrove  | India       | M06 | Gaderu        | Pristine creek              | 16.869 | 82.285  | SV | 11  | 3  | dry    | Bouillon, et al. <sup>20</sup>                                                                                                                            |
| Mangrove  | India       | M06 | Gaderu        | Pristine creek              | 16.793 | 82.304  | TS | 25  | 1  | dry    | Borges, et al. <sup>21</sup>                                                                                                                              |
| Mangrove  | India       | M07 | Kalighat      | Pristine creek              | 13.127 | 92.947  | TS | 48  | 2  | dry    | Linto, et al. <sup>22</sup>                                                                                                                               |
| Mangrove  | India       | M07 | Kalighat      | Pristine creek              | 13.118 | 92.944  | SV | 30  | 2  | dry    | Linto, et al. <sup>22</sup>                                                                                                                               |
| Mangrove  | India       | M08 | Wright Myo    | Pristine creek              | 11.971 | 92.707  | TS | 96  | 4  | dry    | Linto, et al. <sup>22</sup>                                                                                                                               |
| Mangrove  | India       | M08 | Wright Myo    | Pristine creek              | 11.821 | 92.676  | SV | 60  | 4  | dry    | Linto, et al. <sup>22</sup>                                                                                                                               |
| Mangrove  | India       | M09 | Kochi         | Impacted creek              | 9.924  | 76.322  | TS | 23  | 1  | dry    | Santos, et al. (unpublished)                                                                                                                              |
| Mangrove  | Philippines | M10 | Panay         | Pristine creek              | 11.806 | 122.202 | TS | 34  | 2  | annual | Ray, et al. <sup>23</sup>                                                                                                                                 |
| Mangrove  | Philippines | M10 | Panay         | Pristine creek              | 11.806 | 122.202 | SV | 23  | 1  | annual | Ray, et al. <sup>23</sup>                                                                                                                                 |
| Mangrove  | Vietnam     | M11 | Can Gio       | Pristine creek              | 10.506 | 106.883 | TS | 162 | 7  | annual | Taillardat, et al. <sup>24</sup><br>Taillardat, et al. <sup>25</sup>                                                                                      |
| Mangrove  | Vietnam     | M11 | Can Gio       | Pristine creek              | 10.506 | 106.883 | PW | 40  | 10 | annual | Taillardat, et al. <sup>24</sup><br>Taillardat, et al. <sup>25</sup>                                                                                      |
| Mangrove  | Vietnam     | M12 | Ho Cooc       | Impacted creek              | 9.813  | 106.608 | SV | 12  | 4  | annual | Borges, et al. <sup>26</sup>                                                                                                                              |

Supplementary Information (NCOMMS-23-40896) by Reithmaier et al.

|          |                  |     |               |                             |         |         |    |    |    |        |                                   |
|----------|------------------|-----|---------------|-----------------------------|---------|---------|----|----|----|--------|-----------------------------------|
| Mangrove | Vietnam          | M13 | Ca Mau        | Pristine creek              | 8.716   | 104.965 | SV | 63 | 8  | annual | Borges, et al. <sup>26</sup>      |
| Mangrove | Thailand         | M14 | Bangrong      | Pristine creek              | 8.050   | 98.416  | TS | 45 | 2  | annual | Kristensen, et al. (unpublished)  |
| Mangrove | Palau            | M15 | Badeldaob 2   | pristine creek              | 7.391   | 134.586 | TS | 28 | 1  | wet    | Call, et al. <sup>27</sup>        |
| Mangrove | Palau            | M15 | Badeldaob 2   | pristine creek              | 7.391   | 134.586 | PW | 3  | 2  | wet    | Call, et al. <sup>27</sup>        |
| Mangrove | Palau            | M16 | Badeldaob 1   | pristine creek              | 7.367   | 134.578 | TS | 28 | 1  | wet    | Call, et al. <sup>27</sup>        |
| Mangrove | Palau            | M16 | Badeldaob 1   | pristine creek              | 7.367   | 134.578 | PW | 3  | 2  | wet    | Call, et al. <sup>27</sup>        |
| Mangrove | French Guiana    | M17 | Sinnamary     | Pristine estuary            | 5.450   | -53.011 | TS | 20 | 1  | dry    | Ray, et al. <sup>28</sup>         |
| Mangrove | French Guiana    | M17 | Sinnamary     | Pristine estuary            | 5.450   | -53.011 | SV | 19 |    | dry    | Ray, et al. <sup>29</sup>         |
| Mangrove | Brazil           | M18 | Amazon        | Pristine estuary            | -0.878  | -46.629 | SV | 9  | 1  | dry    | Cabral, et al. <sup>30</sup>      |
| Mangrove | Brazil           | M18 | Amazon        | Pristine creek              | -0.878  | -46.629 | TS | 40 | 8  | dry    | Cabral, et al. <sup>30</sup>      |
| Mangrove | Brazil           | M18 | Amazon        | Pristine creek              | -0.925  | -46.618 | PW | 4  | 1  | dry    | Cabral, et al. <sup>30</sup>      |
| Mangrove | Brazil           | M19 | Paraiba       | Pristine creek              | -21.604 | -41.052 | TS | 12 | 1  | wet    | Cotovicz Jr, et al. <sup>31</sup> |
| Mangrove | Brazil           | M20 | Paraty        | Pristine creek              | -23.302 | -44.649 | TS | 57 | 2  | wet    | Cabral, et al. (unpublished)      |
| Mangrove | Brazil           | M20 | Paraty        | Pristine creek              | -23.302 | -44.649 | PW | 12 | 2  | wet    | Cabral, et al. (unpublished)      |
| Mangrove | Brazil           | M21 | Florianopolis | Pristine creek              | -27.649 | -48.553 | TS | 61 | 2  | dry    | Cabral, et al. (unpublished)      |
| Mangrove | Brazil           | M21 | Florianopolis | Pristine creek              | -27.649 | -48.553 | PW | 12 | 2  | dry    | Cabral, et al. (unpublished)      |
| Mangrove | Ecuador          | M22 | Guayas        | Pristine estuary            | -2.370  | -79.842 | SV | 49 | 11 | annual | Belliard, et al. <sup>32</sup>    |
| Mangrove | Ecuador          | M22 | Guayas        | Pristine estuary            | -2.506  | -79.874 | TS | 54 | 2  | annual | Belliard, et al. <sup>32</sup>    |
| Mangrove | Kenya            | M23 | Tana          | Pristine estuary and creeks | -2.540  | 40.536  | SV | 52 | 10 | wet    | Bouillon, et al. <sup>33</sup>    |
| Mangrove | Kenya            | M23 | Tana          | Pristine estuary and creeks | -2.540  | 40.536  | PW | 8  | 5  | wet    | Bouillon, et al. <sup>33</sup>    |
| Mangrove | Kenya            | M24 | Gazi Bay      | Pristine estuary and creeks | -4.413  | 39.511  | SV | 46 | 11 | dry    | Bouillon, et al. <sup>34</sup>    |
| Mangrove | Papua New Guinea | M25 | Nagada        | Pristine creek              | -5.150  | 145.800 | TS | 39 | 5  | dry    | Borges, et al. <sup>21</sup>      |
| Mangrove | Tanzania         | M26 | Ras Dege      | Pristine creek              | -6.876  | 39.457  | TS | 23 | 1  | dry    | Bouillon, et al. <sup>35</sup>    |

Supplementary Information (NCOMMS-23-40896) by Reithmaier et al.

|          |            |     |              |                  |         |         |    |     |   |        |                                |
|----------|------------|-----|--------------|------------------|---------|---------|----|-----|---|--------|--------------------------------|
| Mangrove | Tanzania   | M26 | Ras Dege     | Pristine creek   | -6.876  | 39.457  | SV | 22  | 4 | annual | Bouillon, et al. <sup>35</sup> |
| Mangrove | Tanzania   | M27 | Mtoni        | Impacted creek   | -6.880  | 39.308  | TS | 24  | 1 | dry    | Bouillon, et al. <sup>35</sup> |
| Mangrove | Tanzania   | M27 | Mtoni        | Impacted creek   | -6.880  | 39.308  | SV | 18  | 4 | annual | Bouillon, et al. <sup>35</sup> |
| Mangrove | Madagascar | M28 | Betsiboka    | Pristine estuary | -15.888 | 46.328  | SV | 23  | 6 | wet    | Ralison, et al. <sup>36</sup>  |
| Mangrove | Australia  | M29 | Darwin       | Pristine creek   | -12.442 | 130.871 | PW | 12  | 2 | dry    | Sippo, et al. <sup>37</sup>    |
| Mangrove | Australia  | M29 | Darwin       | Pristine creek   | -12.520 | 130.906 | TS | 24  | 1 | dry    | Sippo, et al. <sup>37</sup>    |
| Mangrove | Australia  | M30 | Johnstone    | Pristine creek   | -17.529 | 146.061 | TS | 26  | 1 | dry    | Santos, et al. (unpublished)   |
| Mangrove | Australia  | M31 | Hinchinbrook | Pristine creek   | -18.244 | 146.228 | TS | 24  | 1 | dry    | Sippo, et al. <sup>37</sup>    |
| Mangrove | Australia  | M31 | Hinchinbrook | Pristine creek   | -18.256 | 146.266 | PW | 12  | 2 | dry    | Sippo, et al. <sup>37</sup>    |
| Mangrove | Australia  | M32 | Burdekin     | Pristine creek   | -19.623 | 147.565 | TS | 27  | 1 | dry    | Santos, et al. (unpublished)   |
| Mangrove | Australia  | M33 | Fitzroy      | Pristine creek   | -23.513 | 150.785 | TS | 26  | 1 | dry    | Santos, et al. (unpublished)   |
| Mangrove | Australia  | M34 | 1770         | Pristine creek   | -24.189 | 151.879 | PW | 6   | 2 | dry    | Sippo, et al. <sup>37</sup>    |
| Mangrove | Australia  | M34 | 1770         | Pristine creek   | -24.192 | 151.570 | TS | 25  | 1 | dry    | Sippo, et al. <sup>37</sup>    |
| Mangrove | Australia  | M35 | Jacobs Well  | Pristine creek   | -27.780 | 153.381 | PW | 9   | 2 | annual | Sippo, et al. <sup>37</sup>    |
| Mangrove | Australia  | M35 | Jacobs Well  | Pristine creek   | -27.781 | 153.380 | TS | 83  | 3 | annual | Sippo, et al. <sup>37</sup>    |
| Mangrove | Australia  | M36 | Evans Head   | Pristine creek   | -29.121 | 153.428 | TS | 108 | 4 | annual | Santos, et al. <sup>38</sup>   |
| Mangrove | Australia  | M36 | Evans Head   | Pristine creek   | -29.121 | 153.428 | PW | 4   | 1 | dry    | Santos, et al. <sup>38</sup>   |
| Mangrove | Australia  | M37 | Newcastle    | Pristine creek   | -32.850 | 151.768 | PW | 12  | 2 | wet    | Sippo, et al. <sup>37</sup>    |
| Mangrove | Australia  | M37 | Newcastle    | Pristine creek   | -32.851 | 151.768 | TS | 25  | 1 | wet    | Sippo, et al. <sup>37</sup>    |
| Mangrove | Australia  | M38 | Barwon Heads | Pristine creek   | -38.257 | 144.487 | TS | 25  | 1 | wet    | Sippo, et al. <sup>37</sup>    |
| Mangrove | Australia  | M38 | Barwon Heads | Pristine creek   | -38.264 | 144.497 | PW | 9   | 2 | wet    | Sippo, et al. <sup>37</sup>    |

**Supplementary Table 2** | Calculations of inorganic carbon dynamics per site in porewater (PW) and surface water (SW).

| Ecosystem | ID  | Site           | Type | TA:DIC<br>ratio<br>(median) | TA:DIC<br>ratio (min) | TA:DIC<br>ratio (max) | TA:DIC<br>slope | TA:DIC<br>slope R <sup>2</sup> | TA <sub>n</sub> :DIC <sub>n</sub><br>slope | TA <sub>n</sub> :DIC <sub>n</sub><br>slope R <sup>2</sup> | Tidal<br>range (m) | Tidal<br>pH<br>range |
|-----------|-----|----------------|------|-----------------------------|-----------------------|-----------------------|-----------------|--------------------------------|--------------------------------------------|-----------------------------------------------------------|--------------------|----------------------|
| Saltmarsh | S01 | Sage Lot Pond  | PW   | 0.796                       | 0.102                 | 1.18                  | 0.82            | 0.96                           | 0.82                                       | 0.95                                                      | NA                 | NA                   |
| Saltmarsh | S01 | Sage Lot Pond  | SW   | 1.04                        | 0.885                 | 1.24                  | 0.67            | 0.71                           | 0.61                                       | 0.6                                                       | 0.975              | NA                   |
| Saltmarsh | S02 | Suisun Marsh   | SW   | 0.972                       | 0.6                   | 1                     | 0.94            | 0.65                           | 0.97                                       | 0.83                                                      | 1.62               | 0.25                 |
| Saltmarsh | S03 | Oyster Landing | PW   | 0.88                        | 0.656                 | 0.937                 | 0.73            | 0.83                           | 0.79                                       | 0.86                                                      | NA                 | 0.07                 |
| Saltmarsh | S03 | Oyster Landing | SW   | 0.948                       | 0.802                 | 1.06                  | 1.07            | 0.45                           | 0.86                                       | 0.98                                                      | 1.27               | NA                   |
| Saltmarsh | S04 | Duplin River   | SW   | 1.01                        | 0.932                 | 1.09                  | 0.92            | 0.93                           | 0.61                                       | 0.84                                                      | 6.68               | 0.98                 |
| Saltmarsh | S05 | Los Toruños    | SW   | 1.14                        | 0.996                 | 1.8                   | 0.58            | 0.48                           | 0.59                                       | 0.5                                                       | NA                 | 0.43                 |
| Saltmarsh | S06 | Chuangdong     | PW   | 0.942                       | 0.855                 | 1.38                  | 0.89            | 0.99                           | 0.89                                       | 0.99                                                      | NA                 | NA                   |
| Saltmarsh | S06 | Chuangdong     | SW   | 1.02                        | 0.822                 | 1.22                  | 0.98            | 0.97                           | 1                                          | 0.97                                                      | 4.12               | NA                   |
| Saltmarsh | S07 | Hangzhou Bay   | PW   | 0.943                       | 0.886                 | 0.974                 | 0.89            | 0.99                           | 0.9                                        | 0.99                                                      | NA                 | 0.39                 |
| Saltmarsh | S07 | Hangzhou Bay   | SW   | 1.04                        | 0.904                 | 1.05                  | 1               | 0.99                           | 1                                          | 0.99                                                      | NA                 | NA                   |
| Saltmarsh | S08 | Zhangjiang E.  | PW   | 0.982                       | 0.916                 | 1.12                  | 0.88            | 0.96                           | 0.9                                        | 0.96                                                      | NA                 | NA                   |
| Saltmarsh | S08 | Zhangjiang E.  | SW   | 0.991                       | 0.891                 | 1.04                  | 0.74            | 0.94                           | 0.72                                       | 0.94                                                      | 3.26               | NA                   |
| Mangrove  | M01 | Everglades     | SW   | 1                           | 0.948                 | 1.11                  | 0.94            | 0.97                           | 0.92                                       | 0.92                                                      | 0.668              | 0.01                 |
| Mangrove  | M02 | Iriomote       | SW   | 1.16                        | 1.02                  | 1.18                  | 0.79            | 0.64                           | 0.68                                       | 0.72                                                      | NA                 | 0.19                 |
| Mangrove  | M03 | Zhangjiang E.  | PW   | 0.896                       | 0.802                 | 0.982                 | 0.77            | 0.99                           | 0.76                                       | 0.96                                                      | NA                 | NA                   |
| Mangrove  | M03 | Zhangjiang E.  | SW   | 0.998                       | 0.904                 | 1.1                   | 0.97            | 0.82                           | 0.97                                       | 0.82                                                      | 3.26               | NA                   |
| Mangrove  | M04 | Sundarbans     | SW   | 1.08                        | 0.106                 | 1.11                  | 0.98            | 0.45                           | 0.83                                       | 0.34                                                      | NA                 | 0.10                 |
| Mangrove  | M05 | Bhitarkanika   | SW   | 1.02                        | 0.988                 | 1.1                   | 1.06            | 0.99                           | 1.01                                       | 0.97                                                      | NA                 | NA                   |
| Mangrove  | M06 | Gaderu         | SW   | 1.03                        | 0.976                 | 1.2                   | 0.63            | 0.83                           | 0.61                                       | 0.97                                                      | 1.37               | NA                   |
| Mangrove  | M07 | Kalighat       | SW   | 1.01                        | 0.914                 | 1.21                  | 0.76            | 0.82                           | 0.92                                       | 0.94                                                      | 0.255              | 0.34                 |
| Mangrove  | M08 | Wright Myo     | SW   | 0.989                       | 0.454                 | 1.16                  | 0.83            | 0.85                           | 0.62                                       | 0.64                                                      | 0.265              | -0.14                |
| Mangrove  | M09 | Kochi          | SW   | 0.998                       | 0.889                 | 1.17                  | 0.24            | 0.6                            | 0.22                                       | 0.57                                                      | 0.47               | 0.37                 |
| Mangrove  | M10 | Panay          | SW   | 0.998                       | 0.955                 | 1.16                  | 0.9             | 0.99                           | 0.94                                       | 0.98                                                      | 1                  | -0.33                |
| Mangrove  | M11 | Can Gio        | PW   | 0.532                       | 0.18                  | 0.748                 | 0.47            | 0.8                            | 0.5                                        | 0.85                                                      | NA                 | 0.00                 |
| Mangrove  | M11 | Can Gio        | SW   | 0.838                       | 0.607                 | 1.03                  | 0.81            | 0.9                            | 0.75                                       | 0.9                                                       | 3.41               | NA                   |
| Mangrove  | M12 | Ho Cooc        | SW   | 0.976                       | 0.936                 | 1.12                  | 1.15            | 0.91                           | 0.66                                       | 0.97                                                      | NA                 | 0.17                 |

Supplementary Information (NCOMMS-23-40896) by Reithmaier et al.

|          |     |               |    |       |       |       |       |      |       |      |       |      |
|----------|-----|---------------|----|-------|-------|-------|-------|------|-------|------|-------|------|
| Mangrove | M13 | Ca Mau        | SW | 1     | 0.932 | 1.14  | 0.91  | 0.88 | 0.66  | 0.98 | NA    | NA   |
| Mangrove | M14 | Bangrong      | SW | 1.05  | 0.791 | 1.19  | 1.12  | 0.96 | 0.79  | 0.83 | 3.2   | NA   |
| Mangrove | M15 | Badeldaob 2   | PW | 0.724 | 0.578 | 0.794 | 0.99  | 0.82 | 1.35  | 1    | NA    | 0.08 |
| Mangrove | M15 | Badeldaob 2   | SW | 1.02  | 0.95  | 1.12  | 1.16  | 0.98 | 1.12  | 0.97 | 0.885 | NA   |
| Mangrove | M16 | Badeldaob 1   | PW | 0.784 | 0.765 | 0.853 | 0.97  | 1    | 0.97  | 1    | NA    | 0.52 |
| Mangrove | M16 | Badeldaob 1   | SW | 0.948 | 0.904 | 1.25  | 0.64  | 0.82 | 0.61  | 0.78 | 0.834 | NA   |
| Mangrove | M17 | Sinnamary     | SW | 1.08  | 0.136 | 1.35  | 1.15  | 0.94 | 0.55  | 0.62 | 1.22  | 0.62 |
| Mangrove | M18 | Amazon        | PW | 1     | 0.301 | 1.14  | 0.1   | 0.02 | 0.54  | 0.37 | NA    | 0.69 |
| Mangrove | M18 | Amazon        | SW | 1.03  | 0.761 | 1.11  | 0.95  | 0.97 | 0.95  | 0.97 | 4.63  | NA   |
| Mangrove | M19 | Paraiba       | SW | 0.745 | 0.684 | 1.25  | 0.63  | 0.66 | 0.04  | 0.1  | 0.32  | 0.80 |
| Mangrove | M20 | Paraty        | PW | 0.91  | 0.397 | 1     | 0.24  | 0.72 | 0.26  | 0.66 | NA    | 0.00 |
| Mangrove | M20 | Paraty        | SW | 1.1   | 1.02  | 1.25  | 1.31  | 0.62 | 0.77  | 0.23 | 1.64  | NA   |
| Mangrove | M21 | Florianopolis | PW | 0.632 | 0.55  | 0.753 | 0.67  | 0.95 | 0.77  | 0.96 | NA    | 0.67 |
| Mangrove | M21 | Florianopolis | SW | 1.04  | 0.654 | 1.22  | 0.42  | 0.41 | 0.33  | 0.35 | 0.78  | NA   |
| Mangrove | M22 | Guayas        | SW | 0.961 | 0.843 | 1.04  | 1.17  | 1    | 0.98  | 0.95 | 4.3   | 0.72 |
| Mangrove | M23 | Tana          | PW | 0.889 | 0.701 | 0.941 | 0.91  | 0.99 | 0.9   | 0.99 | NA    | 0.05 |
| Mangrove | M23 | Tana          | SW | 0.991 | 0.894 | 1.16  | 1.03  | 0.96 | 0.96  | 0.99 | NA    | NA   |
| Mangrove | M24 | Gazi Bay      | SW | 0.989 | 0.902 | 1.12  | 0.97  | 0.95 | 0.89  | 0.98 | NA    | NA   |
| Mangrove | M25 | Nagada        | SW | 1.12  | 0.935 | 1.24  | 0.71  | 0.84 | 0.9   | 0.83 | NA    | NA   |
| Mangrove | M26 | Ras Dege      | SW | 1.03  | 0.931 | 1.17  | 0.78  | 0.97 | 0.73  | 0.97 | 2.61  | NA   |
| Mangrove | M27 | Mtoni         | SW | 1.07  | 0.876 | 1.18  | 0.72  | 0.71 | 0.76  | 0.87 | 2.5   | 0.81 |
| Mangrove | M28 | Betsiboka     | SW | 1.09  | 0.927 | 1.23  | 1.15  | 0.96 | 0.75  | 0.82 | NA    | 0.27 |
| Mangrove | M29 | Darwin        | PW | 1.36  | 0.675 | 1.57  | 0.95  | 0.67 | 1.2   | 0.87 | NA    | NA   |
| Mangrove | M29 | Darwin        | SW | 1.11  | 0.959 | 1.2   | 0.19  | 0.25 | 0.12  | 0.1  | 4.21  | NA   |
| Mangrove | M30 | Johnstone     | SW | 1.03  | 0.955 | 1.08  | 1.21  | 0.96 | 0.62  | 0.35 | NA    | 0.22 |
| Mangrove | M31 | Hinchinbrook  | PW | 0.958 | 0.873 | 1.04  | 0.92  | 0.98 | 0.92  | 0.97 | NA    | NA   |
| Mangrove | M31 | Hinchinbrook  | SW | 1.03  | 0.879 | 1.08  | -0.03 | 0.05 | -0.05 | 0.12 | 1.87  | NA   |
| Mangrove | M32 | Burdekin      | SW | 0.993 | 0.95  | 1.13  | 0.83  | 0.98 | 0.84  | 0.99 | NA    | 0.34 |
| Mangrove | M33 | Fitzroy       | SW | 1.07  | 0.985 | 1.09  | 0.92  | 1    | 0.84  | 0.99 | NA    | NA   |
| Mangrove | M34 | 1770          | PW | 0.89  | 0.475 | 0.983 | 1.05  | 0.97 | 0.68  | 0.84 | NA    | NA   |
| Mangrove | M34 | 1770          | SW | 1.13  | 1.01  | 1.19  | 0.64  | 0.69 | 0.13  | 0.05 | 2.49  | NA   |

|          |     |              |    |       |       |       |       |      |       |      |      |      |
|----------|-----|--------------|----|-------|-------|-------|-------|------|-------|------|------|------|
| Mangrove | M35 | Jacobs Well  | PW | 0.955 | 0.921 | 1.09  | 0.87  | 0.84 | 0.85  | 0.8  | NA   | 0.64 |
| Mangrove | M35 | Jacobs Well  | SW | 1.06  | 0.953 | 1.13  | 0.51  | 0.92 | 0.59  | 0.86 | 1.66 | NA   |
| Mangrove | M36 | Evans Head   | PW | 0.799 | 0.772 | 0.828 | 0.52  | 0.87 | 0.47  | 0.88 | NA   | 0.92 |
| Mangrove | M36 | Evans Head   | SW | 1.07  | 0.56  | 1.53  | 1.1   | 0.92 | 0.57  | 0.44 | 1.26 | NA   |
| Mangrove | M37 | Newcastle    | PW | 1.12  | 0.963 | 1.25  | 1.21  | 0.98 | 1.21  | 0.99 | NA   | 0.72 |
| Mangrove | M37 | Newcastle    | SW | 1.03  | 0.975 | 1.07  | -0.11 | 0.14 | -0.02 | 0.01 | 1.08 | NA   |
| Mangrove | M39 | Barwon Heads | PW | 0.95  | 0.174 | 1.09  | 0.05  | 0.05 | 0.06  | 0.07 | NA   | 0.50 |
| Mangrove | M39 | Barwon Heads | SW | 1.11  | 1.07  | 1.12  | 1.07  | 0.94 | 1.09  | 0.91 | 1.18 | NA   |

**Supplementary Table 3** | Alkalinity (TA) and dissolved inorganic carbon (DIC) outwelling rates from mangroves and saltmarshes.

| Ecosystem | Country | Site          | Method   | Latitude | Longitude | Season (tide) | TA<br>outwelling<br>(mmol/m <sup>2</sup> /d) | DIC<br>outwelling<br>(mmol/m <sup>2</sup> /d) | Reference                      |
|-----------|---------|---------------|----------|----------|-----------|---------------|----------------------------------------------|-----------------------------------------------|--------------------------------|
| Saltmarsh | MA, USA | Sage Lot Pond | Eulerian | 41.5546  | -70.5071  | spring        |                                              | 67                                            | Tamborski, et al. <sup>1</sup> |
| Saltmarsh | MA, USA | Sage Lot Pond | Eulerian | 41.5546  | -70.5071  | summer        |                                              | 358                                           | Tamborski, et al. <sup>1</sup> |
| Saltmarsh | MA, USA | Sage Lot Pond | Eulerian | 41.5546  | -70.5071  | fall          |                                              | 117                                           | Tamborski, et al. <sup>1</sup> |
| Saltmarsh | MA, USA | Sage Lot Pond | Eulerian | 41.5546  | -70.5071  | annual        |                                              | 180                                           | Tamborski, et al. <sup>1</sup> |
| Saltmarsh | MA, USA | Sage Lot Pond | Eulerian | 41.5546  | -70.5071  | spring        |                                              | 32                                            | Wang, et al. <sup>2</sup>      |
| Saltmarsh | MA, USA | Sage Lot Pond | Eulerian | 41.5546  | -70.5071  | spring        |                                              | 88                                            | Wang, et al. <sup>2</sup>      |
| Saltmarsh | MA, USA | Sage Lot Pond | Eulerian | 41.5546  | -70.5071  | summer        |                                              | 114                                           | Wang, et al. <sup>2</sup>      |
| Saltmarsh | MA, USA | Sage Lot Pond | Eulerian | 41.5546  | -70.5071  | summer        |                                              | 118                                           | Wang, et al. <sup>2</sup>      |
| Saltmarsh | MA, USA | Sage Lot Pond | Eulerian | 41.5546  | -70.5071  | summer        |                                              | 127                                           | Wang, et al. <sup>2</sup>      |
| Saltmarsh | MA, USA | Sage Lot Pond | Eulerian | 41.5546  | -70.5071  | fall          |                                              | 147                                           | Wang, et al. <sup>2</sup>      |
| Saltmarsh | MA, USA | Sage Lot Pond | Eulerian | 41.5546  | -70.5071  | fall          |                                              | 65                                            | Wang, et al. <sup>2</sup>      |
| Saltmarsh | MA, USA | Sage Lot Pond | Eulerian | 41.5546  | -70.5071  | fall          |                                              | 118                                           | Wang, et al. <sup>2</sup>      |
| Saltmarsh | MA, USA | Sage Lot Pond | Eulerian | 41.5546  | -70.5071  | winter        |                                              | 86                                            | Wang, et al. <sup>2</sup>      |
| Saltmarsh | MA, USA | Sage Lot Pond | Eulerian | 41.5546  | -70.5071  | annual        |                                              | 95                                            | Wang, et al. <sup>2</sup>      |
| Saltmarsh | MA, USA | Sage Lot Pond | Eulerian | 41.5546  | -70.5071  | summer        |                                              | 247                                           | Chu, et al. <sup>4</sup>       |
| Saltmarsh | MA, USA | Sage Lot Pond | Eulerian | 41.5546  | -70.5071  | fall          |                                              | 170                                           | Chu, et al. <sup>4</sup>       |
| Saltmarsh | MA, USA | Sage Lot Pond | Eulerian | 41.5546  | -70.5071  | average       |                                              | 171                                           |                                |

Supplementary Information (NCOMMS-23-40896) by Reithmaier et al.

|           |         |                  |                       |         |           |        |     |     |                                     |
|-----------|---------|------------------|-----------------------|---------|-----------|--------|-----|-----|-------------------------------------|
| Saltmarsh | CA, USA | Suisun Wetland   | Eulerian              | 38.1715 | -122.0601 | annual | 21  | 22  | Bogard, et al. <sup>6</sup>         |
| Saltmarsh | VA, USA | Sweet Hall Marsh | Eulerian              | 37.5503 | -76.8884  | summer | 63  | 82  | Neubauer and Anderson <sup>39</sup> |
| Saltmarsh | VA, USA | Sweet Hall Marsh | Eulerian              | 37.5503 | -76.8884  | summer | 58  | 66  | Neubauer and Anderson <sup>39</sup> |
| Saltmarsh | VA, USA | Sweet Hall Marsh | Eulerian              | 37.5503 | -76.8884  | fall   | 26  | 33  | Neubauer and Anderson <sup>39</sup> |
| Saltmarsh | VA, USA | Sweet Hall Marsh | Eulerian              | 37.5503 | -76.8884  | annual | 36  | 44  | Neubauer and Anderson <sup>39</sup> |
| Saltmarsh | NC, USA | Freeman Creek    | Eulerian, resp. rates | 34.5980 | -77.3270  | annual |     | 52  | Czapla, et al. <sup>40</sup>        |
| Saltmarsh | SC, USA | Oyster Landing   | Rn mass balance       | 33.3333 | -79.2000  | summer |     | 40  | Morris and Whiting <sup>41</sup>    |
| Saltmarsh | GA, USA | Wassaw Sound     | Lagrangian            | 31.9269 | -80.9562  | annual |     | 62  | Cai, et al. <sup>42</sup>           |
| Saltmarsh | GA, USA | Duplin River     | Lagrangian            | 31.4206 | -81.2958  | fall   | 90  | 120 | Wang and Cai <sup>8</sup>           |
| Saltmarsh | GA, USA | Duplin River     | Lagrangian            | 31.4206 | -81.2958  | fall   | 53  | 78  | Wang and Cai <sup>8</sup>           |
| Saltmarsh | GA, USA | Duplin River     | Lagrangian            | 31.4206 | -81.2958  | winter | 21  | 40  | Wang and Cai <sup>8</sup>           |
| Saltmarsh | GA, USA | Duplin River     | Lagrangian            | 31.4206 | -81.2958  | winter | 5   | 38  | Wang and Cai <sup>8</sup>           |
| Saltmarsh | GA, USA | Duplin River     | Lagrangian            | 31.4206 | -81.2958  | winter | 3   | 35  | Wang and Cai <sup>8</sup>           |
| Saltmarsh | GA, USA | Duplin River     | Lagrangian            | 31.4206 | -81.2958  | spring | 109 | 130 | Wang and Cai <sup>8</sup>           |
| Saltmarsh | GA, USA | Duplin River     | Lagrangian            | 31.4206 | -81.2958  | spring | 29  | 89  | Wang and Cai <sup>8</sup>           |
| Saltmarsh | GA, USA | Duplin River     | Lagrangian            | 31.4206 | -81.2958  | spring | 10  | 33  | Wang and Cai <sup>8</sup>           |
| Saltmarsh | GA, USA | Duplin River     | Lagrangian            | 31.4206 | -81.2958  | summer | 18  | 68  | Wang and Cai <sup>8</sup>           |
| Saltmarsh | GA, USA | Duplin River     | Lagrangian            | 31.4206 | -81.2958  | summer | 34  | 62  | Wang and Cai <sup>8</sup>           |
| Saltmarsh | GA, USA | Duplin River     | Lagrangian            | 31.4206 | -81.2958  | summer | 51  | 69  | Wang and Cai <sup>8</sup>           |
| Saltmarsh | GA, USA | Duplin River     | Lagrangian            | 31.4206 | -81.2958  | fall   | 34  | 40  | Wang and Cai <sup>8</sup>           |
| Saltmarsh | GA, USA | Duplin River     | Lagrangian            | 31.4206 | -81.2958  | fall   | 50  | 75  | Wang and Cai <sup>8</sup>           |
| Saltmarsh | GA, USA | Duplin River     | Lagrangian            | 31.4206 | -81.2958  | fall   | 41  | 68  | Wang and Cai <sup>8</sup>           |
| Saltmarsh | GA, USA | Duplin River     | Lagrangian            | 31.4206 | -81.2958  | winter | 27  | 73  | Wang and Cai <sup>8</sup>           |
| Saltmarsh | GA, USA | Duplin River     | Lagrangian            | 31.4206 | -81.2958  | winter | -4  | 45  | Wang and Cai <sup>8</sup>           |
| Saltmarsh | GA, USA | Duplin River     | Lagrangian            | 31.4206 | -81.2958  | winter | 1   | 42  | Wang and Cai <sup>8</sup>           |
| Saltmarsh | GA, USA | Duplin River     | Lagrangian            | 31.4206 | -81.2958  | spring | -22 | 12  | Wang and Cai <sup>8</sup>           |
| Saltmarsh | GA, USA | Duplin River     | Lagrangian            | 31.4206 | -81.2958  | spring | 21  | 42  | Wang and Cai <sup>8</sup>           |
| Saltmarsh | GA, USA | Duplin River     | Lagrangian            | 31.4206 | -81.2958  | annual | 11  | 36  | Wang and Cai <sup>8</sup>           |
| Saltmarsh | MA, USA | Duplin River     | Eulerian              | 31.4458 | -81.2857  | winter |     | 60  | Wang, et al. <sup>43</sup>          |



## Supplementary Information (NCOMMS-23-40896) by Reithmaier et al.

|           |              |                                |                |          |          |                 |    |      |                                  |
|-----------|--------------|--------------------------------|----------------|----------|----------|-----------------|----|------|----------------------------------|
| Saltmarsh | MA, USA      | Duplin River                   | Eulerian       | 31.4458  | -81.2857 | spring          |    | 35   | Wang, et al. <sup>43</sup>       |
| Saltmarsh | MA, USA      | Duplin River                   | Eulerian       | 31.4458  | -81.2857 | spring          |    | 48   | Wang, et al. <sup>43</sup>       |
| Saltmarsh | MA, USA      | Duplin River                   | Eulerian       | 31.4458  | -81.2857 | summer          |    | 10   | Wang, et al. <sup>43</sup>       |
| Saltmarsh | MA, USA      | Duplin River                   | Eulerian       | 31.4458  | -81.2857 | fall            |    | -44  | Wang, et al. <sup>43</sup>       |
| Saltmarsh | MA, USA      | Duplin River                   |                | 31.4458  | -81.2857 | average         | 30 | 53   |                                  |
| Saltmarsh | GA, USA      | Altamaha River                 | Mixing model   | 31.3370  | -81.3851 | fall            | 69 | 82   | Cai, et al. <sup>44</sup>        |
| Saltmarsh | GA, USA      | Satilla River                  | Mixing model   | 30.9726  | -81.5087 | fall            | 0  | 1    | Cai, et al. <sup>44</sup>        |
| Saltmarsh | China        | Chuandong                      | Eulerian       | 33.0366  | 120.8407 | fall            | 78 | 202  | Yau, et al. <sup>10</sup>        |
| Saltmarsh | China        | Chuandong                      | Eulerian       | 33.0265  | 120.8991 | summer (spring) |    | 177  | Chen, et al. <sup>11</sup>       |
| Saltmarsh | China        | Chuandong                      | Eulerian       | 33.0265  | 120.8991 | summer (neap)   |    | 243  | Chen, et al. <sup>11</sup>       |
| Saltmarsh | China        | Chuandong                      | Eulerian       | 33.0265  | 120.8991 | winter (spring) |    | 657  | Chen, et al. <sup>11</sup>       |
| Saltmarsh | China        | Chuandong                      | Eulerian       | 33.0265  | 120.8991 | winter (neap)   |    | 339  | Chen, et al. <sup>11</sup>       |
| Saltmarsh | China        | Chuandong                      | Eulerian       | 33.0265  | 120.8991 | annual          |    | 557  | Chen, et al. <sup>11</sup>       |
| Saltmarsh | China        | Chuandong                      | Eulerian       | 33.0265  | 120.8991 | average         |    | 363  |                                  |
| Saltmarsh | China        | Chongming Dongtan              | Eulerian       | 31.4808  | 122.0661 | winter          |    | 1052 | Liu, et al. <sup>45</sup>        |
| Saltmarsh | China        | Hangzuhou Bay                  | Eulerian       | 30.3548  | 121.1278 | spring          |    | 1200 | Zhu, et al. <sup>46</sup>        |
| Saltmarsh | China        | Zhangjiang Estuary             | Darcy's Law    | 23.9206  | 117.4264 | fall (spring)   | -1 | -1   | Lu (unpublished)                 |
| Saltmarsh | China        | Zhangjiang Estuary             | Darcy's Law    | 23.9206  | 117.4264 | fall (neap)     | -4 | -4   | Lu (unpublished)                 |
| Saltmarsh | China        | Zhangjiang Estuary             | Darcy's Law    | 23.9206  | 117.4264 | average         | -2 | -2   | Lu (unpublished)                 |
| Saltmarsh | South Africa | Swartkops estuary              | Eulerian       | -33.8667 | 25.6333  | annual          |    | 247  | Winter, et al. <sup>47</sup>     |
| Mangrove  | FL, USA      | Everglades                     | Lagrangian     | 25.3625  | -81.0847 | dry             |    | 21   | Ho, et al. <sup>48</sup>         |
| Mangrove  | FL, USA      | Everglades                     | Lagrangian     | 25.3625  | -81.0847 | dry             |    | 13   | Ho, et al. <sup>48</sup>         |
| Mangrove  | FL, USA      | Everglades                     | Eulerian       | 25.3625  | -81.0847 | dry             | 97 | 142  | Reithmaier, et al. <sup>13</sup> |
| Mangrove  | FL, USA      | Everglades                     |                | 25.3625  | -81.0847 | average         | 97 | 59   |                                  |
| Mangrove  | Taiwan       | Danshuei ( <i>K. obovata</i> ) | Conc. gradient | 25.1372  | 121.4581 | spring          |    | -42  | Li, et al. <sup>49</sup>         |
| Mangrove  | Taiwan       | Danshuei ( <i>K. obovata</i> ) | Conc. gradient | 25.1372  | 121.4581 | summer          |    | -17  | Li, et al. <sup>49</sup>         |
| Mangrove  | Taiwan       | Danshuei ( <i>K. obovata</i> ) | Conc. gradient | 25.1372  | 121.4581 | fall            |    | -33  | Li, et al. <sup>49</sup>         |
| Mangrove  | Taiwan       | Danshuei ( <i>K. obovata</i> ) | Conc. gradient | 25.1372  | 121.4581 | annual          |    | -43  | Li, et al. <sup>49</sup>         |
| Mangrove  | Taiwan       | Erhlin ( <i>K. obovata</i> )   | Conc. gradient | 23.9342  | 120.3142 | spring          |    | 708  | Li, et al. <sup>49</sup>         |
| Mangrove  | Taiwan       | Erhlin ( <i>K. obovata</i> )   | Conc. gradient | 23.9342  | 120.3142 | summer          |    | 242  | Li, et al. <sup>49</sup>         |
| Mangrove  | Taiwan       | Erhlin ( <i>K. obovata</i> )   | Conc. gradient | 23.9342  | 120.3142 | fall            |    | -342 | Li, et al. <sup>49</sup>         |
| Mangrove  | Taiwan       | Erhlin ( <i>K. obovata</i> )   | Conc. gradient | 23.9342  | 120.3142 | winter          |    | 333  | Li, et al. <sup>49</sup>         |
| Mangrove  | Taiwan       | Erhlin ( <i>K. obovata</i> )   | Conc. gradient | 23.9342  | 120.3142 | annual          |    | 292  | Li, et al. <sup>49</sup>         |

Supplementary Information (NCOMMS-23-40896) by Reithmaier et al.

|          |               |                              |                |         |          |               |    |     |                                  |
|----------|---------------|------------------------------|----------------|---------|----------|---------------|----|-----|----------------------------------|
| Mangrove | Taiwan        | Erhlin ( <i>K. obovata</i> ) | Conc. gradient | 23.9342 | 120.3142 | spring        |    | 567 | Li, et al. <sup>49</sup>         |
| Mangrove | Taiwan        | Erhlin ( <i>K. obovata</i> ) | Conc. gradient | 23.9342 | 120.3142 | summer        |    | 167 | Li, et al. <sup>49</sup>         |
| Mangrove | Taiwan        | Erhlin ( <i>K. obovata</i> ) | Conc. gradient | 23.9342 | 120.3142 | fall          |    | 33  | Li, et al. <sup>49</sup>         |
| Mangrove | Taiwan        | Erhlin ( <i>K. obovata</i> ) | Conc. gradient | 23.9342 | 120.3142 | winter        |    | 633 | Li, et al. <sup>49</sup>         |
| Mangrove | Taiwan        | Erhlin ( <i>K. obovata</i> ) | Conc. gradient | 23.9342 | 120.3142 | annual        |    | 370 | Li, et al. <sup>49</sup>         |
| Mangrove | Taiwan        | Erhlin Stream                | Conc. gradient | 23.9342 | 120.3142 | average       |    | 344 | Li, et al. <sup>49</sup>         |
| Mangrove | Taiwan        | Chiku ( <i>A. marina</i> )   | Conc. gradient | 23.1186 | 120.0889 | spring        |    | 33  | Li, et al. <sup>49</sup>         |
| Mangrove | Taiwan        | Chiku ( <i>A. marina</i> )   | Conc. gradient | 23.1186 | 120.0889 | summer        |    | 292 | Li, et al. <sup>49</sup>         |
| Mangrove | Taiwan        | Chiku ( <i>A. marina</i> )   | Conc. gradient | 23.1186 | 120.0889 | fall          |    | 117 | Li, et al. <sup>49</sup>         |
| Mangrove | Taiwan        | Chiku ( <i>A. marina</i> )   | Conc. gradient | 23.1186 | 120.0889 | winter        |    | 33  | Li, et al. <sup>49</sup>         |
| Mangrove | Taiwan        | Chiku ( <i>A. marina</i> )   | Conc. gradient | 23.1186 | 120.0889 | annual        |    | 121 | Li, et al. <sup>49</sup>         |
| Mangrove | Japan         | Fukido River                 | Eulerian       | 24.4870 | 124.2304 | dry           |    | 113 | Ohtsuka, et al. <sup>50</sup>    |
| Mangrove | Japan         | Fukido River                 | Eulerian       | 24.4870 | 124.2304 | wet           |    | 279 | Ohtsuka, et al. <sup>50</sup>    |
| Mangrove | Japan         | Fukido River                 | Eulerian       | 24.4870 | 124.2304 | average       |    | 196 | Ohtsuka, et al. <sup>50</sup>    |
| Mangrove | Japan         | Iriomote Island              | Eulerian       | 24.3838 | 123.8872 | wet           | 44 | 11  | Akhand, et al. <sup>14</sup>     |
| Mangrove | China         | Zhangjiang Estuary           | Darcy's Law    | 23.9247 | 117.4219 | dry (spring)  | 27 | 32  | Lu (unpublished)                 |
| Mangrove | China         | Zhangjiang Estuary           | Darcy's Law    | 23.9247 | 117.4219 | dry (neap)    | 23 | 25  | Lu (unpublished)                 |
| Mangrove | China         | Zhangjiang Estuary           | Darcy's Law    | 23.9247 | 117.4219 | average       | 25 | 29  | Lu (unpublished)                 |
| Mangrove | India         | Sundarbans                   | Eulerian       | 21.6612 | 88.3503  | dry           |    | 202 | Ray, et al. <sup>15</sup>        |
| Mangrove | Philippines   | Panay                        | Eulerian       | 11.8060 | 122.2020 | dry           |    | 94  | Ray, et al. <sup>23</sup>        |
| Mangrove | Philippines   | Panay                        | Eulerian       | 11.8060 | 122.2020 | wet           |    | 164 | Ray, et al. <sup>23</sup>        |
| Mangrove | Philippines   | Panay                        | Eulerian       | 11.8060 | 122.2020 | annual        |    | 140 | Ray, et al. <sup>23</sup>        |
| Mangrove | Vietnam       | Can Gio                      | Eulerian       | 10.5056 | 106.8825 | dry (sym.)    |    | 352 | Taillardat, et al. <sup>24</sup> |
| Mangrove | Vietnam       | Can Gio                      | Eulerian       | 10.5056 | 106.8825 | dry (sym.)    |    | 480 | Taillardat, et al. <sup>24</sup> |
| Mangrove | Vietnam       | Can Gio                      | Eulerian       | 10.5056 | 106.8825 | dry (asym.)   |    | 678 | Taillardat, et al. <sup>24</sup> |
| Mangrove | Vietnam       | Can Gio                      | Eulerian       | 10.5056 | 106.8825 | dry (interm.) |    | 612 | Taillardat, et al. <sup>24</sup> |
| Mangrove | Vietnam       | Can Gio                      | Eulerian       | 10.5056 | 106.8825 | dry (interm.) |    | 339 | Taillardat, et al. <sup>24</sup> |
| Mangrove | Vietnam       | Can Gio                      | Eulerian       | 10.5056 | 106.8825 | average       |    | 492 | Taillardat, et al. <sup>24</sup> |
| Mangrove | Palau         | Badeldaob 2                  | Eulerian       | 7.3911  | 134.5856 | wet           | 2  | 10  | Call, et al. <sup>27</sup>       |
| Mangrove | Palau         | Badeldaob 1                  | Eulerian       | 7.3667  | 134.5775 | wet           | 48 | 79  | Call, et al. <sup>27</sup>       |
| Mangrove | French Guiana | Sinnamary                    | Eulerian       | 5.4500  | -53.0111 | dry           |    | -75 | Ray, et al. <sup>28</sup>        |
| Mangrove | Brazil        | Amazon                       | Eulerian       | -0.8782 | -46.6291 | dry           | 15 | 20  | Cabral, et al. <sup>30</sup>     |
| Mangrove | Ecuador       | Guayas                       | Eulerian       | -2.5056 | -79.8743 | dry           |    | 6   | Belliard, et al. <sup>32</sup>   |

Supplementary Information (NCOMMS-23-40896) by Reithmaier et al.

|          |           |                   |            |          |          |              |     |      |                                |
|----------|-----------|-------------------|------------|----------|----------|--------------|-----|------|--------------------------------|
| Mangrove | Ecuador   | Guayas            | Eulerian   | -2.5056  | -79.8743 | wet          |     | 22   | Belliard, et al. <sup>32</sup> |
| Mangrove | Ecuador   | Guayas            | Eulerian   | -2.5056  | -79.8743 | annual       |     | 17   | Belliard, et al. <sup>32</sup> |
| Mangrove | Australia | Darwin            | Eulerian   | -12.5197 | 130.9060 | dry          | 116 | 85   | Sippo, et al. <sup>37</sup>    |
| Mangrove | Australia | Karumba (living)  | Lagrangian | -17.4265 | 140.8557 | dry          | 951 | 1051 | Sippo, et al. <sup>51</sup>    |
| Mangrove | Australia | Karumba (dead)    | Lagrangian | -17.4265 | 140.8557 | dry          | 600 | 502  | Sippo, et al. <sup>51</sup>    |
| Mangrove | Australia | Hinchinbrook      | Eulerian   | -18.2440 | 146.2280 | dry          | 21  | 22   | Sippo, et al. <sup>37</sup>    |
| Mangrove | Australia | 1770              | Eulerian   | -24.1920 | 151.5698 | dry          | 81  | -97  | Sippo, et al. <sup>37</sup>    |
| Mangrove | Australia | Moreton Bay       | Eulerian   | -27.7775 | 153.4031 | wet (spring) |     | 183  | Maher, et al. <sup>52</sup>    |
| Mangrove | Australia | Moreton Bay       | Eulerian   | -27.7775 | 153.4031 | wet (neap)   |     | 245  | Maher, et al. <sup>52</sup>    |
| Mangrove | Australia | Moreton Bay       | Eulerian   | -27.7775 | 153.4031 | dry (spring) |     | 340  | Maher, et al. <sup>52</sup>    |
| Mangrove | Australia | Moreton Bay       | Eulerian   | -27.7775 | 153.4031 | annual       |     | 250  | Maher, et al. <sup>52</sup>    |
| Mangrove | Australia | Moreton Bay       | Eulerian   | -27.7775 | 153.4031 | wet          | 96  | 212  | Maher, et al. <sup>53</sup>    |
| Mangrove | Australia | Moreton Bay       | Eulerian   | -27.7775 | 153.4031 | average      | 96  | 246  |                                |
| Mangrove | Australia | Jacobs Well       | Eulerian   | -27.7809 | 153.3796 | wet/summer   | 12  | 83   | Sippo, et al. <sup>37</sup>    |
| Mangrove | Australia | Evans Head        | Eulerian   | -29.1208 | 153.4279 | dry (22 mm)  | 60  | 61   | Santos, et al. <sup>38</sup>   |
| Mangrove | Australia | Evans Head        | Eulerian   | -29.1208 | 153.4279 | wet (130 mm) | 567 | 794  | Santos, et al. <sup>38</sup>   |
| Mangrove | Australia | Evans Head        | Eulerian   | -29.1208 | 153.4279 | dry (28 mm)  | 90  | 86   | Santos, et al. <sup>38</sup>   |
| Mangrove | Australia | Evans Head        | Eulerian   | -29.1208 | 153.4279 | dry (0 mm)   | 716 | 522  | Santos, et al. <sup>38</sup>   |
| Mangrove | Australia | Evans Head        | Eulerian   | -29.1208 | 153.4279 | annual       | 358 | 358  | Santos, et al. <sup>38</sup>   |
| Mangrove | Australia | Newcastle         | Eulerian   | -32.8515 | 151.7675 | wet          | 116 | 77   | Sippo, et al. <sup>37</sup>    |
| Mangrove | Australia | Western Port (WI) | Eulerian   | -38.2361 | 145.2610 | wet          | 310 | 460  | Faber, et al. <sup>54</sup>    |
| Mangrove | Australia | Western Port (WI) | Eulerian   | -38.2361 | 145.2610 | wet          | 110 |      | Faber, et al. <sup>54</sup>    |
| Mangrove | Australia | Western Port (WI) | Eulerian   | -38.2361 | 145.2610 | average      | 210 | 460  | Faber, et al. <sup>54</sup>    |
| Mangrove | Australia | Western Port (CI) | Eulerian   | -38.2412 | 145.3167 | wet          | 46  | 140  | Faber, et al. <sup>54</sup>    |
| Mangrove | Australia | Western Port (CI) | Eulerian   | -38.2412 | 145.3167 | wet          | 130 |      | Faber, et al. <sup>54</sup>    |
| Mangrove | Australia | Western Port (CI) | Eulerian   | -38.2412 | 145.3167 | average      | 88  | 140  | Faber, et al. <sup>54</sup>    |
| Mangrove | Australia | Barwon Heads      | Eulerian   | -38.2572 | 144.4870 | wet          | -1  | -3   | Sippo, et al. <sup>37</sup>    |

**Supplementary Table 4** | Average alkalinity (TA) and dissolved inorganic carbon (DIC) outwelling rates per site and potential drivers, including sediment accumulation rate (SAR), and carbon accumulation rate (CAR), retrieved from global datasets<sup>55</sup>.

| Ecosystem | Country      | Site               | TA outwelling<br>(mmol/m <sup>2</sup> /d) | DIC outwelling<br>(mmol/m <sup>2</sup> /d) | Temperature<br>(°C) | Precipitation<br>(mm) | Tidal<br>range (m) | SAR<br>(mm/y) | CAR<br>(gC/m <sup>2</sup> /y) |
|-----------|--------------|--------------------|-------------------------------------------|--------------------------------------------|---------------------|-----------------------|--------------------|---------------|-------------------------------|
| Saltmarsh | MA, USA      | Sage Lot Pond      |                                           | 171                                        | 10                  | 530                   | 1.2                | 2.9           | 118                           |
| Saltmarsh | CA, USA      | Suisun Wetland     | 21                                        | 22                                         | 14                  | 581                   | 1.6                | 3.3           | 122                           |
| Saltmarsh | VA, USA      | Sweet Hall Marsh   | 36                                        | 44                                         | 16                  | 1158                  | 0.2                | 5.6           | 115                           |
| Saltmarsh | NC, USA      | Freeman Creek      |                                           | 52                                         | 17                  | 1339                  | 0.9                | 2.4           | 107                           |
| Saltmarsh | SC, USA      | Oyster Landing     |                                           | 40                                         | 20                  | 927                   | 1.0                | 2.9           | 205                           |
| Saltmarsh | GA, USA      | Wassaw Sound       |                                           | 62                                         | 19                  | 1158                  | 1.4                | 2.1           | 28                            |
| Saltmarsh | GA, USA      | Duplin River       | 30                                        | 53                                         | 19                  | 1158                  | 1.4                | 2.1           | 28                            |
| Saltmarsh | GA, USA      | Altamaha River     | 69                                        | 82                                         | 20                  | 1114                  | 1.4                | 3.4           | 145                           |
| Saltmarsh | GA, USA      | Satilla River      | 0                                         | 1                                          | 21                  | 1047                  | 1.4                | 2.2           | 26                            |
| Saltmarsh | China        | Chuangong          |                                           | 363                                        | 14                  | 1100                  | 3.1                | 40.0          | 392                           |
| Saltmarsh | China        | Chongming Dongtan  |                                           | 1052                                       | 15                  | 1022                  | 4.1                | 15.0          | 18                            |
| Saltmarsh | China        | Hangzuhou Bay      |                                           | 1200                                       | 17                  | 1381                  | 3.4                | 18.5          | 22                            |
| Saltmarsh | China        | Zhangjiang Estuary | -2                                        | -2                                         | 23                  | 1679                  | 2.6                | 14.2          | 405                           |
| Saltmarsh | South Africa | Swartkops estuary  |                                           | 247                                        | 19                  | 563                   | 1.4                | 5.0           | 80                            |
| Mangrove  | FL, USA      | Everglades         | 97                                        | 59                                         | 24                  | 1534                  | 2.2                | 2.7           | 176                           |
| Mangrove  | Taiwan       | Danshuei River     |                                           | -43                                        | 21                  | 2219                  | 1.4                | 18.5          | 22                            |
| Mangrove  | Taiwan       | Erhlin Stream      |                                           | 344                                        | 23                  | 1708                  | 3.4                | 18.5          | 22                            |
| Mangrove  | Taiwan       | Chiku Stream       |                                           | 121                                        | 23                  | 1708                  | 0.9                | 18.5          | 22                            |
| Mangrove  | Japan        | Fukido River       |                                           | 196                                        | 24                  | 2169                  | 1.1                | 15.0          | 18                            |
| Mangrove  | Japan        | Iriomote Island    | 44                                        | 11                                         | 24                  | 2342                  | 1.1                | 15.0          | 18                            |
| Mangrove  | China        | Zhangjiang Estuary | 25                                        | 29                                         | 23                  | 1679                  | 2.6                | 14.2          | 405                           |
| Mangrove  | India        | Sundarbans         |                                           | 202                                        | 28                  | 1750                  | 2.1                | 4.8           | 66                            |
| Mangrove  | Philippines  | Panay              |                                           | 140                                        | 26                  | 2400                  | 1.4                | 8.0           | 281                           |
| Mangrove  | Vietnam      | Can Gio            |                                           | 492                                        | 28                  | 1350                  | 2.9                | 10.0          | 228                           |
| Mangrove  | Palau        | Badeldaob 2        | 2                                         | 10                                         | 27                  | 3700                  | 1.1                | 2.6           | 158                           |

Supplementary Information (NCOMMS-23-40896) by Reithmaier et al.

|          |               |                   |     |      |    |      |     |     |     |
|----------|---------------|-------------------|-----|------|----|------|-----|-----|-----|
| Mangrove | Palau         | Badeldaob 1       | 48  | 79   | 27 | 3700 | 1.1 | 2.2 | 70  |
| Mangrove | French Guiana | Sinnamary         |     | -75  | 28 | 1500 | 2.0 | 8.3 | 254 |
| Mangrove | Brazil        | Amazon            | 15  | 20   | 29 | 3000 | 5.3 | 8.3 | 254 |
| Mangrove | Ecuador       | Guayas            |     | 17   | 24 | 2321 | 2.0 | 5.8 | 462 |
| Mangrove | Australia     | Darwin            | 116 | 85   | 27 | 1694 | 5.3 | 6.3 | 168 |
| Mangrove | Australia     | Karumba           | 951 | 1051 | 34 | 820  | 0.9 | 8.5 | 294 |
| Mangrove | Australia     | Hinchinbrook      | 21  | 22   | 24 | 2001 | 2.2 | 2.7 | 143 |
| Mangrove | Australia     | 1770              | 81  | -97  | 22 | 1196 | 1.9 | 1.3 | 48  |
| Mangrove | Australia     | Moreton Bay       | 96  | 246  | 20 | 1478 | 1.2 | 5.8 | 150 |
| Mangrove | Australia     | Jacobs Well       | 12  | 83   | 20 | 1555 | 1.2 | 2.7 | 99  |
| Mangrove | Australia     | Evans Head        | 358 | 358  | 20 | 1500 | 1.1 | 4.2 | 74  |
| Mangrove | Australia     | Newcastle         | 116 | 77   | 18 | 1139 | 1.1 | 2.0 | 32  |
| Mangrove | Australia     | Western Port (WI) | 210 | 460  | 19 | 810  | 1.4 | 1.3 | 21  |
| Mangrove | Australia     | Western Port (CI) | 88  | 140  | 19 | 810  | 1.4 | 1.3 | 21  |
| Mangrove | Australia     | Barwon Heads      | -1  | -3   | 15 | 666  | 1.0 | 2.7 | 67  |

**Supplementary Table 5** | Net primary production (NPP) and major carbon fates of mangrove and saltmarsh production presented in MgC/ha/y as median  $\pm$  SE (average).

| Parameter                        | Mangroves             | Saltmarshes           | Reference                  |
|----------------------------------|-----------------------|-----------------------|----------------------------|
| Aboveground NPP                  | 5.1 $\pm$ 4.4 (5.2)   | 9.4 $\pm$ 1.1 (12.6)  | Alongi <sup>56</sup>       |
| Belowground NPP                  | 9 $\pm$ 1.7 (13.2)    | 3.7 $\pm$ 0.3 (5)     | Alongi <sup>56</sup>       |
| Total NPP                        | 14.1 $\pm$ 6.1 (18.4) | 13.1 $\pm$ 1.4 (17.6) | Alongi <sup>56</sup>       |
| CO <sub>2</sub> outgassing water | 2.2 $\pm$ 0.4 (3.4)   | 1.6 $\pm$ 0.3 (3)     | Alongi <sup>56</sup>       |
| Carbon burial                    | 1.3 $\pm$ 0.2 (1.9)   | 1.3 $\pm$ 0.1 (1.7)   | Wang, et al. <sup>55</sup> |
| POC outwelling                   | 1.8 $\pm$ 0.2 (1.7)   | 0.3 $\pm$ 0.1 (0.6)   | Alongi <sup>56</sup>       |
| DOC outwelling                   | 1.4 $\pm$ 2 (5.9)     | 1.3 $\pm$ 0.6 (2.6)   | Alongi <sup>56</sup>       |
| DIC outwelling                   | 3.6 $\pm$ 2.1 (6.8)   | 2.5 $\pm$ 4.6 (10.6)  | This study                 |
| Sum of carbon fates              | 10.2 (19.7)           | 7 (18.4)              |                            |
| Unaccounted fate                 | 3.9 (-1.3)            | 6.1 (-0.8)            |                            |

**Supplementary Table 6** | Global alkalinity balance of the ocean.

| Parameter                                   | Tmol/y    | Reference                        |
|---------------------------------------------|-----------|----------------------------------|
| Riverine DIC (dissolved inorganic carbon)   | 32        | Middelburg, et al. <sup>57</sup> |
| Riverine PIC (particulate inorganic carbon) | 21        | Middelburg, et al. <sup>57</sup> |
| Submarine groundwater                       | 1         | Middelburg, et al. <sup>57</sup> |
| Submarine silicate                          | 2.8       | Middelburg, et al. <sup>57</sup> |
| Sulfur burial                               | 4.7       | Middelburg, et al. <sup>57</sup> |
| Denitrification                             | 1.5       | Middelburg, et al. <sup>57</sup> |
| Organic matter burial                       | 3         | Middelburg, et al. <sup>57</sup> |
| Tidal wetlands                              | 4.6       | This study                       |
| <i>Total sources</i>                        | <i>71</i> |                                  |
| Open ocean carbonate burial                 | 23        | Middelburg, et al. <sup>57</sup> |
| Ocean margin carbonate burial               | 36        | Middelburg, et al. <sup>57</sup> |
| Reverse weathering                          | 1         | Middelburg, et al. <sup>57</sup> |
| <i>Total sinks</i>                          | <i>60</i> |                                  |

## Supplementary Methods

### Use of TA:DIC ratios

The ratio of  $\text{CO}_3^{2-}$  to  $\text{HCO}_3^-$  is a major property of carbonate chemistry and determines the buffering capacity of seawater. This is reflected in the Revelle factor (and other buffer factors) that depends on the ratio of  $\text{CO}_3^{2-}$  to  $\text{HCO}_3^-$ , which is proportional to TA:DIC (Egleston, et al. <sup>58</sup>). Consequently, TA:DIC ratios drive pH changes and influence the capacity of seawater to take up anthropogenic  $\text{CO}_2$ , affecting ocean acidification and carbon sequestration. Therefore, the TA:DIC ratio is widely used as a proxy of carbonate equilibrium and speciation in the context of ocean acidification<sup>59-62</sup>.

The change in pH with increasing TA is relatively minor (e.g., pH increases from 7.41 to 7.48 when TA increases from 2000 to 10000  $\mu\text{mol}/\text{kg}$  at a fixed TA:DIC = 1) compared to the changes in pH associated with changing TA:DIC ratios (e.g., pH increases from 6.50 to 7.41 when TA:DIC ratio increases from 0.8 to 1 when DIC = 2000  $\mu\text{mol}/\text{kg}$ , Figure S1 and 2).

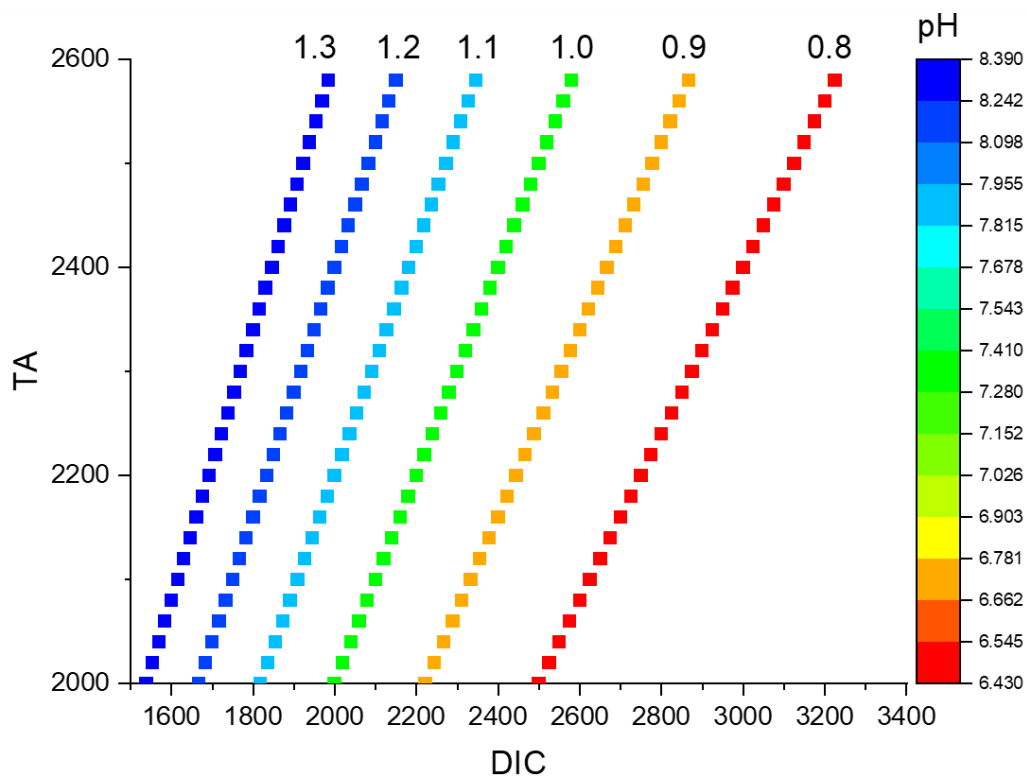

Supplementary Fig. 11. pH increases with increasing TA:DIC ratios.

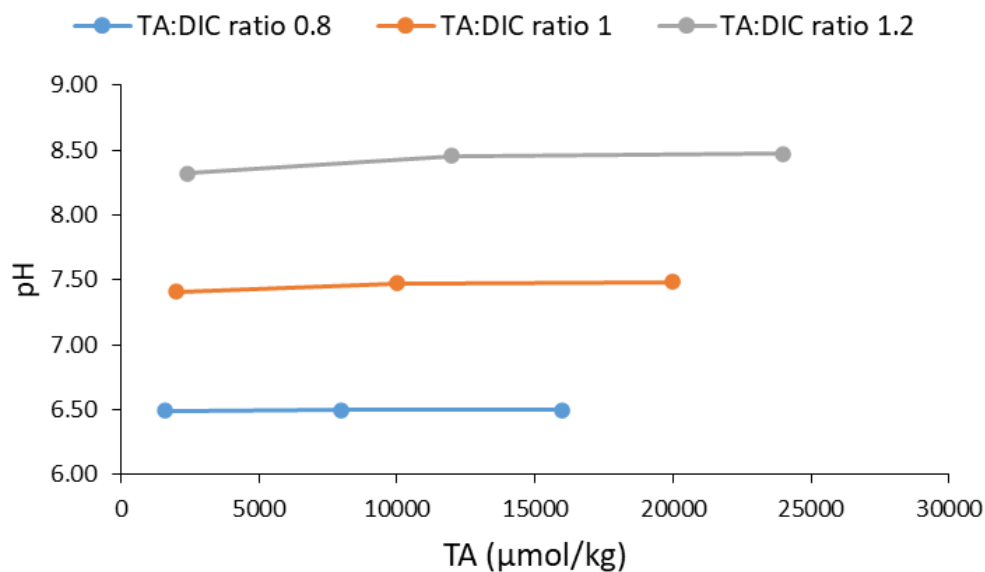

**Supplementary Fig. 12. pH acts as a function of increasing alkalinity (TA) at fixed TA:DIC ratios.**

The linear regressions of TA:DIC ratios show a significantly positive trend using either pH or  $H^+$  concentrations (Figure 2 and Supplementary Figure 13). The scatter around TA:DIC  $\sim 1$  is due to the minimum buffering capacity at this point, where a given increase in  $CO_2$  will cause a larger decrease in pH compared to when TA:DIC  $> 1^2$ .

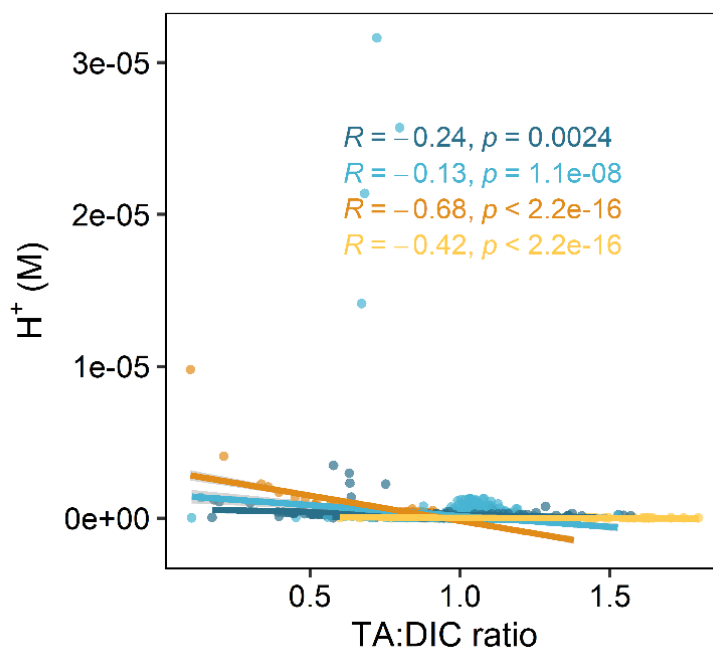

**Supplementary Fig. 13. Regressions analysis between  $H^+$  and TA:DIC ratios.**



## Supplementary References

1. Tamborski, J. J., Eagle, M., Kurylyk, B. L., Kroeger, K. D., Wang, Z. A., Henderson, P. et al. Pore water exchange-driven inorganic carbon export from intertidal salt marshes. *Limnol. Oceanogr.* **66**, 1774-1792 (2021).
2. Wang, Z. A., Kroeger, K. D., Ganju, N. K., Gonneea, M. E. & Chu, S. N. Intertidal salt marshes as an important source of inorganic carbon to the coastal ocean. *Limnol. Oceanogr.* **61**, 1916-1931 (2016).
3. Song, S., Wang, Z. A., Gonneea, M. E., Kroeger, K. D., Chu, S. N., Li, D. et al. An important biogeochemical link between organic and inorganic carbon cycling: Effects of organic alkalinity on carbonate chemistry in coastal waters influenced by intertidal salt marshes. *Geochim. Cosmochim. Acta* **275**, 123-139 (2020).
4. Chu, S. N., Wang, Z. A., Gonneea, M. E., Kroeger, K. D. & Ganju, N. K. Deciphering the dynamics of inorganic carbon export from intertidal salt marshes using high-frequency measurements. *Mar. Chem.* **206**, 7-18 (2018).
5. Brooks, T., Kroeger, M., Mann, K., Wang, A., Ganju, Z., Suttles, N. O. K. et al. Geochemical data supporting investigation of solute and particle cycling and fluxes from two tidal wetlands on the south shore of Cape Cod, Massachusetts. *U.S. Geological Survey data release 2012-19* (2021).
6. Bogard, M. J., Bergamaschi, B. A., Butman, D. E., Anderson, F., Knox, S. H. & Windham-Myers, L. Hydrologic export is a major component of coastal wetland carbon budgets. *Global Biogeochem. Cycles* **34**, e2019GB006430 (2020).
7. Correa, R. E., Xiao, K., Conrad, S. R., Wadnerkar, P. D., Wilson, A. M., Sanders, C. J. et al. Groundwater carbon exports exceed sediment carbon burial in a salt marsh. *Estuaries Coasts* **45**, 1-17 (2021).
8. Wang, Z. A. & Cai, W. J. Carbon dioxide degassing and inorganic carbon export from a marsh-dominated estuary (the Duplin River): A marsh CO<sub>2</sub> pump. *Limnol. Oceanogr.* **49**, 341-354 (2004).
9. Pérez-Lloréns, J., Brun, F., Andria, J. & Vergara, J. Seasonal and tidal variability of environmental carbon related physico-chemical variables and inorganic C acquisition in *Gracilariopsis longissima* and *Enteromorpha intestinalis* from Los Toruños salt marsh (Cádiz Bay, Spain). *J. Exp. Mar. Biol. Ecol.* **304**, 183-201 (2004).
10. Yau, Y. Y., Xin, P., Chen, X., Zhan, L., Call, M., Conrad, S. R. et al. Alkalinity export to the ocean is a major carbon sequestration mechanism in a macrotidal saltmarsh. *Limnol. Oceanogr.* **9999**, 1-13 (2022).
11. Chen, X., Santos, I. R., Hu, D., Zhan, L., Zhang, Y., Zhao, Z. et al. Pore-water exchange flushes blue carbon from intertidal saltmarsh sediments into the sea. *Limnol. Oceanogr. Letters* **7**, 312-320 (2022).
12. Zhu, P., Chen, X., Zhang, Y., Zhang, Q., Wu, X., Zhao, H. et al. Porewater-derived blue carbon outwelling and greenhouse gas emissions in a subtropical multi-species saltmarsh. *Front. Mar. Sci.* **9**, 884951 (2022).
13. Reithmaier, G. M. S., Ho, D. T., Johnston, S. & Maher, D. T. Mangroves as a source of greenhouse gases to the atmosphere and alkalinity and dissolved carbon to the coastal ocean: A case study from the Everglades National Park, Florida. *J. Geophys. Res. Biogeosci.* **125**, e2020JG005812 (2020).
14. Akhand, A., Watanabe, K., Chanda, A., Tokoro, T., Chakraborty, K., Moki, H. et al. Lateral carbon fluxes and CO<sub>2</sub> evasion from a subtropical mangrove-seagrass-coral continuum. *Sci. Total Environ.* **752**, 142190 (2021).
15. Ray, R., Baum, A., Rixen, T., Gleixner, G. & Jana, T. Exportation of dissolved (inorganic and organic) and particulate carbon from mangroves and its implication to the carbon budget in the Indian Sundarbans. *Sci. Total Environ.* **621**, 535-547 (2018).
16. Akhand, A., Chanda, A., Manna, S., Das, S., Hazra, S., Roy, R. et al. A comparison of CO<sub>2</sub> dynamics and air-water fluxes in a river-dominated estuary and a mangrove-dominated marine estuary. *Geophys. Res. Lett.* **43**, 11,726-711,735 (2016).

17. Akhand, A., Chanda, A., Watanabe, K., Das, S., Tokoro, T., Chakraborty, K. et al. Low CO<sub>2</sub> evasion rate from the mangrove-surrounding waters of the Sundarbans. *Biogeochemistry* **153**, 95-114 (2021).
18. Akhand, A., Chanda, A., Watanabe, K., Das, S., Tokoro, T., Hazra, S. et al. Drivers of inorganic carbon dynamics and air–water CO<sub>2</sub> fluxes in two large tropical estuaries: Insights from coupled radon (<sup>222</sup>Rn) and pCO<sub>2</sub> surveys. *Limnol. Oceanogr.* **9999**, 1-15 (2022).
19. Akhand, A., Chanda, A., Watanabe, K., Das, S., Tokoro, T., Hazra, S. et al. Reduction in riverine freshwater supply changes inorganic and organic carbon dynamics and air-water CO<sub>2</sub> fluxes in a tropical mangrove dominated estuary. *J. Geophys. Res. Biogeosci.* **126**, e2020JG006144 (2021).
20. Bouillon, S., Frankignoulle, M., Dehairs, F., Velimirov, B., Eiler, A., Abril, G. et al. Inorganic and organic carbon biogeochemistry in the Gautami Godavari estuary (Andhra Pradesh, India) during pre-monsoon: The local impact of extensive mangrove forests. *Global Biogeochem. Cycles* **17**, 1114 (2003).
21. Borges, A., Djenidi, S., Lacroix, G., Théate, J., Delille, B. & Frankignoulle, M. Atmospheric CO<sub>2</sub> flux from mangrove surrounding waters. *Geophys. Res. Lett.* **30**, 1558 (2003).
22. Linto, N., Barnes, J., Ramachandran, R., Divia, J., Ramachandran, P. & Upstill-Goddard, R. Carbon dioxide and methane emissions from mangrove-associated waters of the Andaman Islands, Bay of Bengal. *Estuaries Coasts* **37**, 381-398 (2014).
23. Ray, R., Miyajima, T., Watanabe, A., Yoshikai, M., Ferrera, C. M., Orizar, I. et al. Dissolved and particulate carbon export from a tropical mangrove-dominated riverine system. *Limnol. Oceanogr.* **66**, 3944-3962 (2021).
24. Taillardat, P., Willemsen, P., Marchand, C., Friess, D., Widory, D., Baudron, P. et al. Assessing the contribution of porewater discharge in carbon export and CO<sub>2</sub> evasion in a mangrove tidal creek (Can Gio, Vietnam). *J. Hydrol.* **563**, 303-318 (2018).
25. Taillardat, P., Ziegler, A. D., Friess, D. A., Widory, D., Van, V. T., David, F. et al. Carbon dynamics and inconstant porewater input in a mangrove tidal creek over contrasting seasons and tidal amplitudes. *Geochim. Cosmochim. Acta* **237**, 32–48 (2018).
26. Borges, A. V., Abril, G. & Bouillon, S. Carbon dynamics and CO<sub>2</sub> and CH<sub>4</sub> outgassing in the Mekong delta. *Biogeosciences* **15**, 1093-1114 (2018).
27. Call, M., Sanders, C. J., Macklin, P. A., Santos, I. R. & Maher, D. T. Carbon outwelling and emissions from two contrasting mangrove creeks during the monsoon storm season in Palau, Micronesia. *Estuar. Coast. Shelf Sci.* **218**, 340-348 (2019).
28. Ray, R., Gérard, T., Romain, W., Vincent, V., Gerd, G., Sylvain, M. et al. Mangrove-derived organic and inorganic carbon exchanges between the Sinnamary estuarine system (French Guiana, South America) and the Atlantic Ocean. *J. Geophys. Res. Biogeosci.* **125**, e2020JG005739 (2020).
29. Ray, R., Michaud, E., Aller, R., Vantrepotte, V., Gleixner, G., Walcker, R. et al. The sources and distribution of carbon (DOC, POC, DIC) in a mangrove dominated estuary (French Guiana, South America). *Biogeochemistry* **138**, 297-321 (2018).
30. Cabral, A., Dittmar, T., Call, M., Scholten, J., de Rezende, C. E., Asp, N. et al. Carbon and alkalinity outwelling across the groundwater-creek-shelf continuum off Amazonian mangroves. *Limnol. Oceanogr. Letters* **6**, 369-378 (2021).
31. Cotovicz Jr, L. C., Vidal, L. O., de Rezende, C. E., Bernardes, M. C., Knoppers, B. A., Sobrinho, R. L. et al. Carbon dioxide sources and sinks in the delta of the Paraíba do Sul River (Southeastern Brazil) modulated by carbonate thermodynamics, gas exchange and ecosystem metabolism during estuarine mixing. *Mar. Chem.* **226**, 103869 (2020).
32. Belliard, J.-P., Hernandez, S., Temmerman, S., Suello, R. H., Dominguez-Granda, L. E., Rosado-Moncayo, A. M. et al. Carbon dynamics and CO<sub>2</sub> and CH<sub>4</sub> exchange in the mangrove dominated Guayas river delta, Ecuador. *Estuar. Coast. Shelf Sci.* **267**, 107766 (2022).
33. Bouillon, S., Dehairs, F., Schiettecatte, L.-S. & Borges, A. V. Biogeochemistry of the Tana estuary and delta (northern Kenya). *Limnol. Oceanogr.* **52**, 46-59 (2007).
34. Bouillon, S., Dehairs, F., Velimirov, B., Abril, G. & Borges, A. V. Dynamics of organic and inorganic carbon across contiguous mangrove and seagrass systems (Gazi Bay, Kenya). *J. Geophys. Res.* **112**, G02018 (2007).

35. Bouillon, S., Middelburg, J. J., Dehairs, F., Borges, A. V., Abril, G., Flindt, M. R. et al. Importance of intertidal sediment processes and porewater exchange on the water column biogeochemistry in a pristine mangrove creek (Ras Dege, Tanzania). *Biogeosciences* **4**, 311-322 (2007).
36. Ralison, O. H., Borges, A. V., Dehairs, F., Middelburg, J. & Bouillon, S. Carbon biogeochemistry of the Betsiboka estuary (north-western Madagascar). *Org. Geochem.* **39**, 1649-1658 (2008).
37. Sippo, J. Z., Maher, D. T., Tait, D. R., Holloway, C. & Santos, I. R. Are mangroves drivers or buffers of coastal acidification? Insights from alkalinity and dissolved inorganic carbon export estimates across a latitudinal transect. *Global Biogeochem. Cycles* **30**, 753-766 (2016).
38. Santos, I. R., Maher, D. T., Larkin, R., Webb, J. R. & Sanders, C. J. Carbon outwelling and outgassing vs. burial in an estuarine tidal creek surrounded by mangrove and saltmarsh wetlands. *Limnol. Oceanogr.* **64**, 996-1013 (2019).
39. Neubauer, S. C. & Anderson, I. C. Transport of dissolved inorganic carbon from a tidal freshwater marsh to the York River estuary. *Limnol. Oceanogr.* **48**, 299-307 (2003).
40. Czaplá, K. M., Anderson, I. C. & Currin, C. A. Net ecosystem carbon balance in a North Carolina, USA, salt marsh. *J. Geophys. Res. Biogeosci.* **125**, e2019JG005509 (2020).
41. Morris, J. T. & Whiting, G. J. Emission of gaseous carbon dioxide from salt-marsh sediments and its relation to other carbon losses. *Estuaries* **9**, 9-19 (1986).
42. Cai, W. J., Wang, Z. A. & Wang, Y. The role of marsh-dominated heterotrophic continental margins in transport of CO<sub>2</sub> between the atmosphere, the land-sea interface and the ocean. *Geophys. Res. Lett.* **30** (2003).
43. Wang, S. R., Di Iorio, D., Cai, W. J. & Hopkinson, C. S. Inorganic carbon and oxygen dynamics in a marsh-dominated estuary. *Limnol. Oceanogr.* **63**, 47-71 (2018).
44. Cai, W.-J., Wang, Y. & Hodson, R. E. Acid-base properties of dissolved organic matter in the estuarine waters of Georgia, USA. *Geochim. Cosmochim. Acta* **62**, 473-483 (1998).
45. Liu, J., Yu, X., Chen, X., Du, J. & Zhang, F. Utility of radium quartet for evaluating porewater-derived carbon to a saltmarsh nearshore water: implications for blue carbon export. *Sci. Total Environ.* **764**, 144238 (2021).
46. Zhu, P., Chen, X., Zhang, Y., Zhang, Q., Wu, X., Zhao, H. et al. Porewater-derived blue carbon outwelling and greenhouse gas emissions in a subtropical multi-species saltmarsh. *Front. Mar. Sci.* **9**, 621 (2022).
47. Winter, P. E., Schlacherl, T. A. & Baird, D. Carbon flux between an estuary and the ocean: a case for outwelling. *Hydrobiologia* **337**, 123-132 (1996).
48. Ho, D. T., Ferrón, S., Engel, V. C., Anderson, W. T., Swart, P. K., Price, R. M. et al. Dissolved carbon biogeochemistry and export in mangrove-dominated rivers of the Florida Everglades. *Biogeosciences* **14**, 2543-2559 (2017).
49. Li, S. B., Chen, P. H., Huang, J. S., Hsueh, M. L., Hsieh, L. Y., Lee, C. L. et al. Factors regulating carbon sinks in mangrove ecosystems. *Global Change Biol.* **24**, 4195-4210 (2018).
50. Ohtsuka, T., Onishi, T., Yoshitake, S., Tomotsune, M., Kida, M., Iimura, Y. et al. Lateral export of dissolved inorganic and organic carbon from a small mangrove estuary with tidal fluctuation. *Forests* **11**, 1041 (2020).
51. Sippo, J. Z., Maher, D. T., Schulz, K. G., Sanders, C. J., McMahon, A., Tucker, J. et al. Carbon outwelling across the shelf following a massive mangrove dieback in Australia: Insights from radium isotopes. *Geochim. Cosmochim. Acta* **253**, 142-158 (2019).
52. Maher, D. T., Santos, I. R., Golsby-Smith, L., Gleeson, J. & Eyre, B. D. Groundwater-derived dissolved inorganic and organic carbon exports from a mangrove tidal creek: The missing mangrove carbon sink? *Limnol. Oceanogr.* **58**, 475-488 (2013).
53. Maher, D. T., Call, M., Santos, I. R. & Sanders, C. J. Beyond burial: Lateral exchange is a significant atmospheric carbon sink in mangrove forests. *Biol. Lett.* **14**, 20180200 (2018).
54. Faber, P. A., Evrard, V., Woodland, R. J., Cartwright, I. C. & Cook, P. L. Pore-water exchange driven by tidal pumping causes alkalinity export in two intertidal inlets. *Limnol. Oceanogr.* **59**, 1749-1763 (2014).
55. Wang, F., Sanders, C. J., Santos, I. R., Tang, J., Schuerch, M., Kirwan, M. L. et al. Global blue carbon accumulation in tidal wetlands increases with climate change. *Natl. Sci. Rev.* **8**, nwaa296 (2021).

56. Alongi, D. M. Carbon cycling in the world's mangrove ecosystems revisited: Significance of non-steady state diagenesis and subsurface linkages between the forest floor and the coastal ocean. *Forests* **11**, 977 (2020).
57. Middelburg, J. J., Soetaert, K. & Hagens, M. Ocean alkalinity, buffering and biogeochemical processes. *Rev. Geophys.* **58**, e2019RG000681 (2020).
58. Egleston, E. S., Sabine, C. L. & Morel, F. M. Revelle revisited: Buffer factors that quantify the response of ocean chemistry to changes in DIC and alkalinity. *Global Biogeochem. Cycles* **24** (2010).
59. Wang, Z. A., Wanninkhof, R., Cai, W.-J., Byrne, R. H., Hu, X., Peng, T.-H. et al. The marine inorganic carbon system along the Gulf of Mexico and Atlantic coasts of the United States: Insights from a transregional coastal carbon study. *Limnol. Oceanogr.* **58**, 325-342 (2013).
60. Li, M., Guo, Y., Cai, W.-J., Testa, J. M., Shen, C., Li, R. et al. Projected increase in carbon dioxide drawdown and acidification in large estuaries under climate change. *Communications Earth & Environment* **4**, 68 (2023).
61. Zhang, Y., Zou, C., Wang, Z. A., Wang, X., Zeng, Z., Xiao, K. et al. Submarine Groundwater Discharge in the Northern Bohai Sea, China: Implications for Coastal Carbon Budgets and Buffering Capacity. *J. Geophys. Res. Biogeosci.* **127**, e2022JG006810 (2022).
62. Yang, X., Xue, L., Li, Y., Han, P., Liu, X., Zhang, L. et al. Treated wastewater changes the export of dissolved inorganic carbon and its isotopic composition and leads to acidification in coastal oceans. *Environ. Sci. Technol.* **52**, 5590-5599 (2018).
